# Supplementary material
Source: ML conference proceedings conference paper supplement (https://openreview.net/forum?id=tOxPaWiA18)
Supplement: supplementary_material [file full_paper_with_appendix_rev3.pdf › supp_r3/full_paper_with_appendix_rev3.pdf]

# THE EFFECT OF TEMPORAL RESOLUTION IN OFFLINE TEMPORAL DIFFERENCE ESTIMATION

Anonymous authors

Paper under double-blind review

## ABSTRACT

Temporal Difference (TD) algorithms are the most widely employed methods in Reinforcement Learning. Notably, previous theoretical analysis on these algorithms consider the sampling time as fixed a priori, while it has been shown that the temporal resolution can impact data efficiency (Burns et al., 2023). In this work, we analyze the performance of mean-path semi-gradient TD(0) for offline value estimation, emphasizing the dependence on the temporal resolution, a factor that indeed proves to be of crucial importance. For continuous-time stochastic linear quadratic dynamical systems with a fixed data-budget, the Mean Squared Error in value estimation shows an optimal non-trivial value for the time discretization, and this choice affects the reliability of the algorithm. We also show that this behavior differs from that of the Monte Carlo algorithm (Zhang et al., 2023). We verify the theoretical characterization in numerical experiments in linear quadratic system instances and further demonstrate, in a stochastic control setting, that the step-size trade-off persists in policy iteration.

## 1 INTRODUCTION

Temporal Difference (TD) is a fundamental idea in Reinforcement Learning (RL) based on bootstrapping value estimates from sampled rewards and current predictions, and it has nowadays become the core method for model-free reinforcement learning algorithms. In RL, samples typically come from a sampling procedure which follows discrete time intervals, where the temporal resolution is fixed a-priori for each application. Previous studies have shown that temporal resolution is an important factor in data efficiency (Burns et al., 2023; Zhang et al., 2023) but is often overlooked in RL research. While the convergence and statistical properties of TD have been studied extensively in the literature (Sutton, 1988; Jaakkola et al., 1993; Tsitsiklis & Van Roy, 1997; Bhandari et al., 2018; Lakshminarayanan & Szepesvari, 2018; Asadi et al., 2024), little is known about the effect of temporal discretization on the TD algorithm from both theoretical and applied perspectives.

In this paper, we study the impact of temporal resolution in value estimation using TD. In particular, we look into a specific class of systems, a continuous-time linear stochastic dynamical system with quadratic instantaneous reward (see e.g. Zhang et al. (2023)):

$$\begin{cases} dx(t) = ax(t)dt + \sigma dw(t) \\ V(x(\tau)) = -\mathbb{E}[\int_{\tau}^{\infty} \gamma^{t-\tau} qx^2(t)dt] \end{cases} \quad (1)$$

where  $w(t)$  is a Wiener process. The drift coefficient  $a$  is unknown, while the diffusion coefficient  $\sigma$ , the reward weight  $q$  and the discount factor  $\gamma \in (0, 1)$  are assumed to be known. The value function  $V(\cdot)$  is defined as the expected cumulative discounted reward. Estimating the infinite-horizon value  $V(x(\tau))$  corresponds to policy evaluation for a fixed linear policy in the continuous-time Linear Quadratic Regulator (LQR) (Lindquist, 1990; Zhang et al., 2023). Note that the optimal policy for this problem is indeed linear in the state. We analyze the Mean-Squared Error (MSE) of the value estimate from a widely used TD algorithm, semi-gradient TD(0) (Sutton & Barto, 2018), in the offline setting, in order to understand how finite-sample properties change with respect to the temporal resolution. By leveraging the fact that for this specific type of system, we can compute the  $n$ -th moment of the state in closed form, for any  $n$ , we provide a characterization of the MSE and identify a trade-off modulated by temporal resolution. Fig. 1 illustrates the trade-off through a numerical experiment, where we plot the learning curve of an offline mean-path semi-gradient

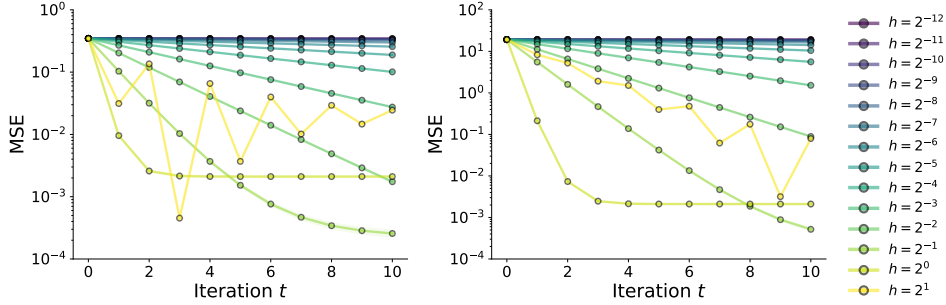

Figure 1: Learning curves of TD(0) show different behavior with respect to temporal resolution  $h$ .

TD(0) algorithm (Bhandari et al., 2018), under two different initializations (see Appendix A.1). The result shows that the best MSE is achieved at an intermediate temporal resolution  $h$ , highlighting the existence of a non-trivial optimal discretization.

The contributions of our work are as follows. First, we develop a framework for analyzing the impact of temporal resolution on offline TD value estimation. Second, we derive an approximate expression of MSE for Offline Mean-Path Semi-gradient TD(0), which shows a trade-off with respect to the length of the sampling intervals. We then derive the optimal temporal resolution  $h^*$  that shows how it scales with the data budget  $B$ . In addition, we establish that the MSE scaling retains the same order with respect to the step size under function approximation errors. Furthermore, we identify sufficient conditions for the convergence of offline mean-path TD(0) and provide finite-sample bounds for both online mean-path and stochastic TD(0). These results extend existing analysis of semi-gradient TD(0) to the continuous, unbounded state space of linear quadratic systems. Lastly, we contrast the trade-off with that of Monte Carlo methods and offer suggestions for choosing temporal resolution in practice. We conduct numerical experiments to validate the theoretical findings. We also confirm that the trade-off generalizes to multidimensional systems and the stochastic TD algorithm. We further demonstrate in a stochastic control setting that the step-size trade-off extends to policy learning. To our best knowledge, this work represents a first step toward understanding the impact of the temporal resolution in TD methods.

## 2 RELATED WORKS

**Temporal discretization** It is well known that the choice of temporal discretization can affect the performance of various RL algorithms. This literature fall into two main categories. The first one studies temporal abstraction, built on top of a base discretization. Sutton et al. (1999) formalized this in the options framework. Numerous variants have shown improved performance, particularly in video games (Sharma et al., 2017; Lakshminarayanan et al., 2017; Machado et al., 2018; Metelli et al., 2020; Dabney et al., 2021). The other line of work is concerned with the base-level discretization rather than building abstractions (Huang et al., 2019; Huang & Zhu, 2020; Park et al., 2021; Lutter et al., 2022; Farrahi & Mahmood, 2023).

The work with the most relevant problem setting to ours is a recent study by Zhang et al. (2023) which analyzed the impact of temporal discretization on the value estimation performance of Monte Carlo methods. Similar to our setting, their work focused on linear quadratic systems and provided analytical results for both finite horizon and infinite horizon settings. However, Monte Carlo methods operate in a fundamentally different way from temporal difference. It remains an open question whether the trade-off observed in their setting extends to TD learning for continuous-time systems.

**Continuous-time RL** Our work focuses on continuous-time dynamical systems. Although RL typically assumes a discrete-time framework, several works have applied RL to continuous-time systems (Baird, 1994; Bradtke & Duff, 1994; Doya, 2000; Wang et al., 2020; Basei et al., 2022; Jia & Zhou, 2022b). Jia & Zhou (2022a) provides a unified continuous-time formulation of various TD methods, and proved that the time-discretized version of these algorithms converge to the continuous-time counterpart in the limit of the discretization. However, the behavior and estima-

tion error of the discretized TD algorithms with a non-zero discretization  $h$ , over a continuous state space, have yet to be characterized.

**Theoretical analysis of TD** Theoretical properties of TD methods have been extensively studied in the literature, as mentioned in Appendix 1. However, we do not revisit them here, since our focus is on understanding how TD value estimation is affected by temporal resolution. Readers interested in a recent overview of TD theory are referred to the related work sections in Tu & Recht (2018) for Least-squares based methods and in Patil et al. (2024) for stochastic-gradient based methods.

In this work, we focus on a specific algorithm of TD known as the mean-path semi-gradient TD(0), in the offline setting. Semi-gradient TD(0), a standard member of the TD family, updates parameters by following the semi-gradient of the squared TD-error with respect to the parameter (Sutton & Barto, 2018). The mean-path version, introduced by Bhandari et al. (2018), instead follows the mean negative semi-gradient under the stationary distribution. Their finite-sample analysis for mean-path TD did not account for time discretization, nor provided closed-form expressions for estimation quality — both of which are crucial for trade-off analysis. **Furthermore, they assume that data are sampled directly from the stationary distribution. This ignores the transient dynamics inherent in practical settings, where data collection includes the mixing phase.** However, this algorithm serves as a good starting point for our analysis. Relatedly, Xiao et al. (2021) analyzed the fixed-point of offline semi-gradient TD(0), under finite state space and overparameterized function approximation, which differs from our setting. And they did not consider time discretization.

### 3 PROBLEM SETTING

In this section, we describe the setting where the analysis will be performed, namely, the system, the data, the algorithm, and the objective.

#### 3.1 CONTINUOUS-TIME STOCHASTIC LINEAR QUADRATIC SYSTEM

As discussed in Appendix 1, the dynamics and the return of the system are given by Eq. 1. Without loss of generality, we set the weight of the reward  $q = 1$  and assume that the process starts at  $x(0) = 0$  (Abbasi-Yadkori et al., 2011; Dean et al., 2020; Zhang et al., 2023). To ensure the value  $V \in \mathbb{R}$  is finite, we assume  $a < 0$ . Using Lemma A.1 from (Zhang et al., 2023), we can derive the closed-form expression for the value  $V$  at  $x(0)$ :

$$V := V(x(0)) = \int_0^\infty \frac{\gamma^t \sigma^2}{2a} (1 - e^{2at}) dt = \frac{-\sigma^2}{(\ln \gamma)(\ln \gamma + 2a)} \quad (2)$$

We consider a linear function approximation of the value function parameterized by  $\theta$ :  $V_\theta(x) = \phi(x)\theta$ , where the value is linear in the feature  $\phi(x)$ . We follow Tu & Recht (2018) and choose the feature as  $\phi(x) := x^2 - \frac{\sigma^2}{\ln \gamma}$ . Since the value function of a linear quadratic system is quadratic in the state  $x$ , it lies exactly in the span of the features. In particular, at the initial state, we have  $V_\theta(0) = \phi(0)\theta = -\frac{\sigma^2}{\ln \gamma}\theta$ . Equating with Equation 2 gives the true parameter:  $\theta^* = \frac{1}{\ln \gamma + 2a}$ .

#### 3.2 OFFLINE DATASET SAMPLED AT TIME INTERVAL $h$

We work with offline data sampled from the continuous-time dynamics described by Equation 1 at discrete time. The dynamics are sampled  $N$  times per trajectory, under a finite data budget  $B$ . The data collection procedure is identical to the one in Zhang et al. (2023), where data are sampled through a uniform discretization of the interval  $[0, T]$ , with  $T < \infty$  being the *estimation horizon*, with time increment  $h$ . This results in the collection of  $N = T/h$  points (which for simplicity is assumed to be an integer) over a single trajectory, at times  $t_k := kh$ , for  $k = 0, \dots, N - 1$ . Given the data budget  $B$ , it is therefore possible to sample from  $M = B/N$  different trajectories. At each time instant  $t_k$  of each trajectory  $i$ , the state  $x_i(t_k)$  is observed and the approximate reward incurred in the interval  $[t_k, t_k + h]$  is computed as  $r_i(t_k) = -hx_i^2(t_k)$ . The offline dataset is gathered as  $\mathcal{D} = \{(x_i(t_k), r_i(t_k), x_i(t_{k+1})) \mid i = 1, 2, \dots, M \text{ and } k = 0, 1, \dots, N - 2\}$ .

**We focus on the offline setting to strictly decouple the sample size from the number of algorithmic updates – quantities that are intrinsically coupled in online learning. By fixing the dataset, we isolate**

the algorithmic dynamics from the sampling process. This makes it possible to rigorously analyze the convergence dynamics of TD under finite-sample.

### 3.3 MEAN-PATH SEMI-GRADIENT TD(0) ON OFFLINE DATA

The semi-gradient TD(0) algorithm starts with an initial parameter estimate  $\theta_0$ , which gets updated iteratively toward the true parameter  $\theta^*$ . At iteration  $t$ , it updates the current estimate  $\theta_t$  according to the sampled triplet containing current state, reward and next state  $(x, r, x')$ , by  $\theta_{t+1} = \theta_t + \alpha g_t(\theta_t)$  where  $\alpha$  is the learning rate, and  $g_t(\theta_t)$  is the negative semi-gradient at iteration  $t$ :  $g_t(\theta_t) = (r + (\gamma^h \phi(x') - \phi(x)) \theta_t) \phi(x)$ , where  $\gamma^h$  is the effective discount factor in the discretized system. In this work, we consider instead an *offline* version of the mean-path TD introduced by Bhandari et al. (2018), whose update rule involves the mean negative semi-gradient over some distribution rather than the stochastic gradient. In the offline setting, the mean negative semi-gradient is computed over the empirical distribution induced by the whole dataset  $\mathcal{D}$ , collected according to the procedure described in Appendix 3.2. The update rule is hence

$$\theta_{t+1} = \theta_t + \alpha \bar{g}(\theta_t), \quad (3)$$

where the mean of the negative semi-gradient is

$$\begin{aligned} \bar{g}(\theta_t) &= \overline{\phi r} + \overline{\phi(\gamma^h \phi' - \phi) \theta_t} \\ &= \frac{1}{M(N-1)} \sum_{i=1}^M \sum_{k=0}^{N-2} \phi(x_i(t_k)) \left( r_i(t_k) + (\gamma^h \phi(x_i(t_{k+1})) - \phi(x_i(t_k))) \theta_t \right), \end{aligned} \quad (4)$$

where  $\overline{\phi r}$  and  $\overline{\phi(\gamma^h \phi' - \phi) \theta_t}$  are shorthands denoting taking the mean over the triplet  $(\phi, r, \phi')$  in the dataset. As a deterministic counterpart to stochastic TD, mean-path analysis avoids the worse-case upper bounds common in the literature (Bhandari et al., 2018). Instead, we show in Appendix 4 that it yields closed-form expressions that capture the exact error landscape, revealing trade-offs that is otherwise obscured by conservative concentration bounds. Furthermore, this formulation transforms the time-dependent stochastic updates into a time-invariant setting, which is crucial in the analysis as it isolates the statistical moments of the data from the algorithmic updates.

### 3.4 OBJECTIVE: MEAN-SQUARED ERROR OF VALUE ESTIMATION

We characterize the Mean-Squared Error of the value estimate from the offline mean-path semi-gradient TD(0) algorithm described above. It is a function of the parameter estimate  $\theta_t$  after  $t$  updates:  $\text{MSE}_t = \mathbb{E}[(V_{\theta_t} - V)^2]$  where  $V_{\theta_t}$  and  $V$  are the infinite-horizon value estimate after  $t$ -step updates and the true value, respectively.  $V_{\theta_t}$  is determined by the parameters  $h, B, T, \sigma, \alpha, \theta_0, t$ .

## 4 THEORETICAL RESULTS ON SEMI-GRADIENT TD(0)

The main goal of this section is to gather insights on the behaviour of the MSE with respect to the temporal resolution parameter  $h$ , through the analysis of the evolution of the parameter  $\theta_t$ . Recall that the ground truth value is  $V = -\frac{\sigma^2}{(\ln \gamma)(\ln \gamma + 2a)}$ . With  $t$  step update with the semi-gradient, we have the value estimate  $V_{\theta_t} = -\frac{1}{\ln \gamma} \sigma^2 \theta_t$ . The corresponding MSE can be expressed as follows:

$$\text{MSE}_t = \mathbb{E}[(V_{\theta_t} - V)^2] = \frac{\sigma^4}{(\ln \gamma)^2} \left( \mathbb{E}[\theta_t^2] - \frac{2\mathbb{E}[\theta_t]}{\ln \gamma + 2a} + \left( \frac{1}{\ln \gamma + 2a} \right)^2 \right), \quad (5)$$

where the expectation is taken w.r.t. the distribution of the data generated by the process  $x(\cdot)$ .

### 4.1 MSE FOR OFFLINE MEAN-PATH SEMI-GRADIENT TD(0)

The following theorem provides the characterization of the MSE for Offline Mean-Path Semi-gradient TD(0) after  $t$  updates, provided the discretization step-size is small:  $h \in (0, 1)$ .

**Theorem 4.1** (Mean Squared Error). *After  $t$  updates, the mean squared error is*

$$\begin{aligned} \text{MSE}_t = & \frac{\sigma^4}{(\ln \gamma)^2} \left\{ \left[ t^2 \alpha^2 \mathcal{I}_3 + 2t\alpha\theta_0 (\mathcal{I}_1 + (2t-1)\alpha\mathcal{I}_5) + \theta_0^2 (1 + 2t\alpha\mathcal{I}_2 + t(3t-2)\alpha^2\mathcal{I}_4) \right] \right. \\ & \left. - \frac{2}{\ln \gamma + 2a} \left[ \theta_0 + t\alpha(\mathcal{I}_1 + \mathcal{I}_2\theta_0) + \frac{t(t-1)}{2} \alpha^2 (\mathcal{I}_5 + \mathcal{I}_4\theta_0) \right] + \left( \frac{1}{\ln \gamma + 2a} \right)^2 \right\} + \mathcal{O}(h^3) \quad (6) \end{aligned}$$

where  $\mathcal{I}_1, \dots, \mathcal{I}_5$  are auxiliary terms dependent on  $h$  but not  $t, \alpha$ , introduced in Appendix A.2. Importantly, the MSE can be expressed as:

$$\text{MSE}_t = C_0 + C_1 h + C_2 h^2 + \mathcal{O}(h^3) \quad (7)$$

where  $C_0 \geq 0, C_1 \leq 0, C_2 \geq 0$  are constants with respect to  $h$ , given by:

$$\begin{aligned} C_0 &= \frac{\sigma^4}{(\ln \gamma)^2} \left( \theta_0 - \frac{1}{\ln \gamma + 2a} \right)^2, \\ C_1 &= \frac{t\alpha\sigma^4}{(\ln \gamma)^2} \left( \theta_0 - \frac{1}{\ln \gamma + 2a} \right)^2 \left[ -2(2a + \ln \gamma) C_{11} + \frac{\alpha(2t-1)(2a + \ln \gamma)^2 C_{31}}{B} \right], \\ C_2 &= \frac{t\alpha\sigma^4}{(\ln \gamma)^2} \left( \theta_0 - \frac{1}{\ln \gamma + 2a} \right)^2 \left[ 2C_{23} - 2(2a + \ln \gamma)C_{12} + \right. \\ & \quad \left. (C_{11}^2 + \frac{C_{320}}{B})(2a + \ln \gamma)^2(2t-1)\alpha \right]. \end{aligned}$$

The constants  $C_{11} < 0, C_{12} > 0, C_{23} > 0, C_{31} < 0, C_{320} > 0$  depend only on  $a, T, \ln \gamma, \sigma^4$ , and their precise forms are given in Appendix A.2.

The theorem presents the expression for the  $t$ -step MSE in Equation 6. In order to clearly exhibit the order of  $h$  in the MSE, we derive another approximate form of  $t$ -step MSE in Equation 7, offering more interpretable insights. For small  $h$ , the MSE approximately follows a quadratic relation in  $h$ , and the minimum is attained when  $h$  is strictly positive, i.e.,  $h^* > 0$ . It confirms the existence of a trade-off in the temporal resolution parameter for the offline mean-path semi-gradient TD(0).

#### 4.2 OPTIMAL TEMPORAL RESOLUTION $h^*$ IN OFFLINE MEAN-PATH TD(0)

The optimal discretization step-size  $h^*$  represents the time interval at which we would ideally sample our dynamical system in order to have the best estimation of the value in term of the MSE. A precise form for this optimal parameter can be found by exploiting the approximate expression of the MSE in Equation 7, as shown in the next corollary.

**Corollary 4.2** (Optimal Discretization). *The optimal  $h^*$  based on the approximation Equation 7 after  $t$  updates is*

$$h^* \approx -\frac{C_1}{2C_2} = -\frac{-2(2a + \ln \gamma) C_{11} + \frac{\alpha(2t-1)(2a + \ln \gamma)^2 C_{31}}{B}}{2 \left[ 2C_{23} - 2(2a + \ln \gamma)C_{12} + (C_{11}^2 + \frac{C_{320}}{B})(2a + \ln \gamma)^2(2t-1)\alpha \right]}, \quad (8)$$

and the minimum MSE is

$$\begin{aligned} \text{MSE}_t^* \approx & \frac{\sigma^4 \left( \theta_0 - \frac{1}{\ln \gamma + 2a} \right)^2}{(\ln \gamma)^2} \\ & \left[ 1 - \frac{4t\alpha \left( -2(2a + \ln \gamma) C_{11} + \frac{\alpha(2t-1)(2a + \ln \gamma)^2 C_{31}}{B} \right)^2}{2C_{23} - 2(2a + \ln \gamma)C_{12} + (C_{11}^2 + \frac{C_{320}}{B})(2a + \ln \gamma)^2(2t-1)\alpha} \right]. \quad (9) \end{aligned}$$

The expression in Equation 8 is clearly dependent on the specific dynamical system or environment at hand. Therefore setting the time discretization to the optimal value would be impossible without full knowledge of the dynamics. Although it is possible to empirically find the optimal temporal



resolution by sweeping over different discretization intervals, it would be impractical to sample the dataset at different frequencies just to maintain the one that has proved the most effective in terms of the MSE for the value estimation. On the other hand, if the  $1/B$  terms are relatively small, the resulting optimal  $h$  would be insensitive to the change in  $B$ . We will show empirically in Appendix 5 that it is indeed the case.

For large enough data budgets  $B$ , we can show that the optimal time discretization  $h^*$  is independent from the data budget, and further simplify the expressions, shown in the next corollary.

**Corollary 4.3** (Asymptotic Optimal Discretization). *(i) If the budget  $B$  is large while the horizon  $T$  is fixed and finite, one can obtain*

$$\begin{aligned} \text{MSE}_t &= \{1 + t\alpha [-2(2a + \ln \gamma)(C_{11}h + C_{12}h^2) + 2C_{23}h^2 + C_{11}^2h^2(2a + \ln \gamma)^2(2t - 1)\alpha]\} \\ &\quad * \frac{\sigma^4}{(\ln \gamma)^2} \left( \theta_0 - \frac{1}{\ln \gamma + 2a} \right)^2 + \mathcal{O}\left(\frac{1}{B}\right) + \mathcal{O}(h^3). \\ h^* &\approx -\frac{-2(2a + \ln \gamma)C_{11}}{2[2C_{23} - 2(2a + \ln \gamma)C_{12} + C_{11}^2(2a + \ln \gamma)^2(2t - 1)\alpha]}. \end{aligned}$$

*(ii) If the horizon  $T$  is large (and thus  $B$  is also large, since  $B = \frac{TM}{h}$ ), we have*

$$\begin{aligned} \text{MSE}_t &= \frac{\sigma^4}{(\ln \gamma)^2} \left( \theta_0 - \frac{1}{\ln \gamma + 2a} \right)^2 \left\{ 1 + t\alpha \left[ \frac{\sigma^4(2a + \ln \gamma)(2a + 3\ln \gamma)}{2a^2 \ln \gamma} h \right. \right. \\ &\quad \left. \left. + (2a + \ln \gamma)^2 \left( \frac{3\sigma^4}{4a^2} + \frac{\sigma^8(2a + 3\ln \gamma)^2(2t - 1)\alpha}{16a^4(\ln \gamma)^2} \right) h^2 \right] \right\} + \mathcal{O}\left(\frac{1}{T}\right) + \mathcal{O}(h^3). \\ h^* &\approx -\frac{4a^2 \ln \gamma(2a + 3\ln \gamma)}{(2a + \ln \gamma)(12a^2(\ln \gamma)^2 + \sigma^4(2a + 3\ln \gamma)^2(2t - 1)\alpha)} \end{aligned}$$

**Remark 4.4.** The two cases in Corollary 4.3 are consistent: letting  $T$  be large in (i) recovers the expression in (ii).

**How to choose temporal resolution for TD** The fact that  $h^*$  is insensitive to the data budget  $B$  has important practical implications. An optimal  $h^*$  can be efficiently determined by performing a grid search on  $h$  using a baseline data budget  $B_0$ . Concretely, we can consider an initial “burn-in” phase: collect a dataset of size  $B_0$ , estimate the value  $V$  via Monte Carlo as in Zhang et al. (2023), and perform a grid search over  $h$  based on the empirical MSE, by sub-sampling this dataset. Then increasing  $B$  can verify if  $h^*$  remains stable. If so, the same  $h$  can be reused for larger data budgets, thereby reducing hyperparameter search costs while maintaining accurate value estimation.

#### 4.3 MSE OF OFFLINE MEAN-PATH TD(0) UNDER FUNCTION APPROXIMATION ERRORS

Our analysis above assumes that the true value function lies in the linear span of the features. However, the standard setting in RL (Sutton & Barto, 2018) is underparameterized, where the features do not perfectly represent the value function, leading to function approximation errors. We demonstrate that the fundamental characteristics of our analysis remain valid in this regime. Specifically, we show that the scaling of MSE with respect to step-size retains the same order in the underparameterized setting. The detailed derivation and analysis are provided in Appendix A.6.

#### 4.4 CONVERGENCE ANALYSIS OF TD(0)

Existing TD(0) analysis (Tsitsiklis & Van Roy, 1997; Bhandari et al., 2018) is limited to finite state spaces and does not apply to the continuous domain of stochastic linear quadratic systems. While the finite-sample behavior of LSTD has been analyzed (Tu & Recht, 2018), we are unaware of any convergence results for TD(0) in this setting. We bridge this gap by establishing the convergence properties of TD(0) in stochastic LQ systems across three algorithmic settings: 1, offline mean-path: we identify sufficient conditions for the convergence to the corresponding LSTD estimate (details in Appendices A.4.1 and A.5); 2, standard mean-path: we provide a finite-sample analysis, generalizing the framework of Bhandari et al. (2018) to stochastic LQ systems (see Appendices A.4.2 and A.5); 3, online stochastic TD: we provide a finite-sample analysis for the online setting, similarly extending the analysis of Bhandari et al. (2018) to the unbounded domain (see Appendix A.7).

#### 4.5 COMPARISON WITH MONTE CARLO

Recent work by Zhang et al. (2023) established that Monte Carlo (MC) estimation exhibits a trade-off in MSE w.r.t.  $h$ , under the same problem setting as ours. They derived the exact MSE expression (Theorem 3.6 in Zhang et al. (2023)) and showed that  $\text{MSE}_{\text{MC}} = \mathcal{O}(\frac{1}{hB} + h)$ . They further demonstrated that the optimal  $h$  scales polynomially with  $B$ , namely:  $h_{\text{MC}}^* \approx B^{-1/2}$ . In contrast, our analysis indicates that for TD learning, the optimal step-size  $h^*$  behaves differently – it remains largely constant w.r.t.  $B$ .

To build intuition, consider how variance reacts to the changes in the data budget  $B$ . TD implicitly performs a maximum-likelihood fit of the value-function parameters within its chosen model (Sutton & Barto, 2018). Once sufficient data are available to obtain a stable parameter estimate, additional samples yield little further variance reduction. This explains why the trade-off and hence  $h^*$  is largely insensitive to  $B$ . In contrast, the Monte-Carlo estimator in Zhang et al. (2023) directly averages returns. Increasing  $B$  continues to reduce trajectory variance, hence affecting the trade-off.

In the next section, we present numerical experiments that illustrate and confirm these theoretical differences between TD and MC estimation.

### 5 NUMERICAL EXPERIMENTS

To empirically validate our theoretical analysis in the previous section, we conduct simulations on continuous-time stochastic linear quadratic systems. While our theoretical framework characterizes the trade-off in Langevin dynamics, we investigate whether these insights hold for TD in practice, especially for multi-step updates. By systematically varying temporal resolution, data budget, and system parameters, we quantify how the discretization choices impact the MSE of the value estimation of TD. We also perform a comparison between TD and Monte Carlo methods.

#### 5.1 OFFLINE MEAN-PATH TD ON LINEAR QUADRATIC SYSTEMS

In our experiments, we perform 50 independent runs to approximate the expectation in the MSE computation. In each run, we generate a new dataset by simulating the Langevin process of Appendix 3.1 with a unique random seed, following the procedure outlined in Appendix 3.2. We then apply the offline mean-path semi-gradient TD(0) algorithm, as described in Appendix 3.3, to obtain an estimate and compute the squared error relative to the true value. The lines in the plots represent the mean squared error averaged over the 50 runs, while the shaded regions indicate the standard error. We fix the parameter  $\sigma = 1$  throughout the experiments. The values of  $h$  is chosen from this grid:  $h \in \{2^{-15}, 2^{-14}, \dots, 2^{-2}\} T$ .

**Trajectory and convergence of the iterates:** In order to understand the evolution over updates of the parameter  $\theta_t$ , when following the gradient dynamics in equation 3, we can start by looking at the fixed points of the latter. If  $\bar{\theta}$  is a fixed point of the gradient dynamics, then from equation 3 we have that  $\bar{\theta}$  must satisfy  $\bar{g}(\bar{\theta}) = 0$ . From equation 4 we then derive:

$$\begin{aligned} \bar{\theta} &= - \left( \overline{\phi(\gamma^h \phi' - \phi)} \right)^{-1} \overline{\phi r} \\ &= - \left( \sum_{i=1}^M \sum_{k=0}^{N-2} \phi(x_i(t_k)) [\gamma^h \phi(x_i(t_{k+1})) - \phi(x_i(t_k))] \right)^{-1} \sum_{i=1}^M \sum_{k=0}^{N-2} \phi(x_i(t_k)) r_i(t_k), \quad (10) \end{aligned}$$

which represents the unique fixed point, and it coincides with the LSTD estimate  $\theta_{\text{LSTD}}$ .

Convergence to the LSTD estimate is empirically shown in Figure 2, where the evolution of the parameter  $\theta_t$  converges to the unique fixed point, and indeed the average semi-gradient converges to 0. From Figure 2 one can note that  $\theta_t$  converges to the LSTD estimate even if it starts closer to the true parameter  $\theta^*$ , as is the case in plot (b), while convergence to the optimal parameter is achieved only if the latter coincides with  $\theta_{\text{LSTD}}$ , as shown in plot (d).

**Asymptotic MSE vs  $h$ :** In Figure 3, we illustrate how the asymptotic MSE varies with  $h$ , under the parameters  $a = -8, T = 8, \gamma = 0.9$ . For each  $h$ , the learning rate is optimized from  $\{0.1, 1.0, 10.0\}$  and TD is run until convergence. The plot shows the MSE for three different initializations of  $\theta_0$ . In all cases, the iterates converge to the LSTD estimate, consistent with the earlier discussion on convergence.

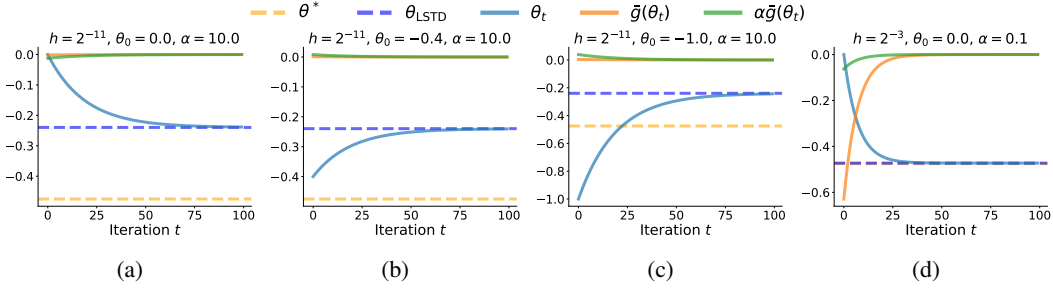Figure 2: Trajectory of the parameter  $\theta_t$  as it converges to the fixed point  $\theta_{\text{LSTD}}$ 

**Dependence of MSE and  $h^*$  on the data budget  $B$ :** We plot the asymptotic MSE of TD as a function of  $B$  while keeping other parameters fixed to  $a = -8, T = 8, \gamma = 0.9, \theta_0 = 0$ . As shown in Figure 5 (left), increasing  $B$  generally reduces the MSE, since more data yields more accurate estimates. However, varying  $B$  has negligible effect on the optimal step size  $h^*$ . It aligns with the trend in Figure 13 for one-step TD (Appendix), where  $h^*$  remain stable across different  $B$ .

**MSE for multi-dimensional systems:** To investigate whether the trade-off generalizes from scalar to vector systems, we run experiments on a three-dimensional system where the dynamics matrix  $A$  is randomly sampled following the scheme in Zhang et al. (2023). Figure 4 demonstrates that the trade off and the behavior of  $h^*$  w.r.t  $B$  persists in the vector setting.

**MSE under varying dynamics parameter  $a$ :** Figure 5 (right) illustrates the asymptotic MSE when we vary system dynamics parameter  $a$  over  $\{-1, -2, -4, -6, -8, -16\}$ . The other parameters are fixed to  $T = 8, B = 4096, \gamma = 0.9, \theta_0 = 0$ . As  $|a|$  increases, the MSE across all step sizes  $h$  decreases as the system decays faster.

**MSE at various number of updates  $t$ :** Figure 6 illustrates how the MSE evolves w.r.t  $h$  over update steps, under two different algorithm parameter settings while keeping the system parameters fixed at  $a = -8, T = 8, B = 16384, \gamma = 0.9$ . In both plots, the algorithm is run for 100 update steps for each fixed  $h$ , with learning rate  $\alpha = 0.1$ . The left plot starts from  $\theta_0 = 0$ , while the right plot starts from  $\theta_0 = 0.4$ . In both cases, the MSE decreases with the number of updates and converges quickly. However, the trade-off in MSE w.r.t  $h$  persists as the updates progress. Notably, the optimal step size  $h^*$  appears to remain stable once the number of updates  $t$  is sufficiently large.

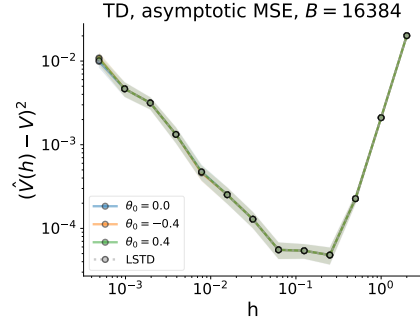

Figure 3: Asymptotic MSE

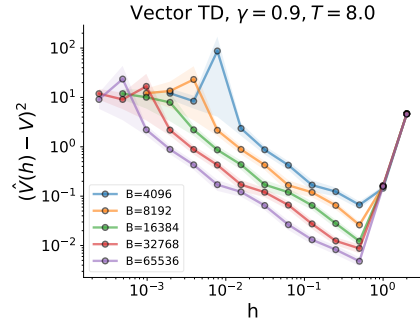

Figure 4: MSE for 3-dimensional systems

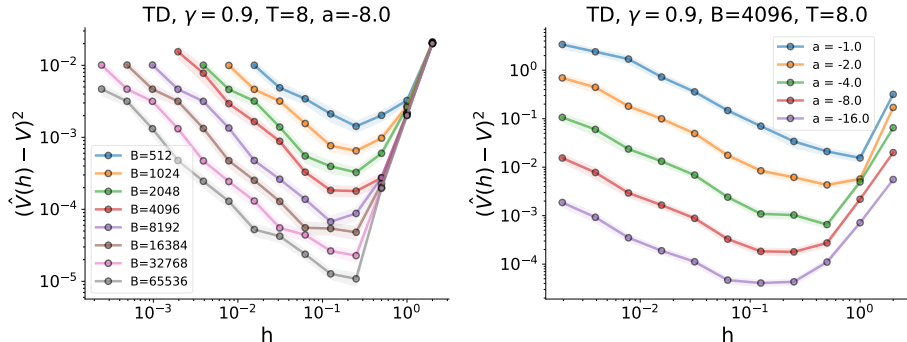Figure 5: MSE under varying  $B$  and  $a$ , respectively



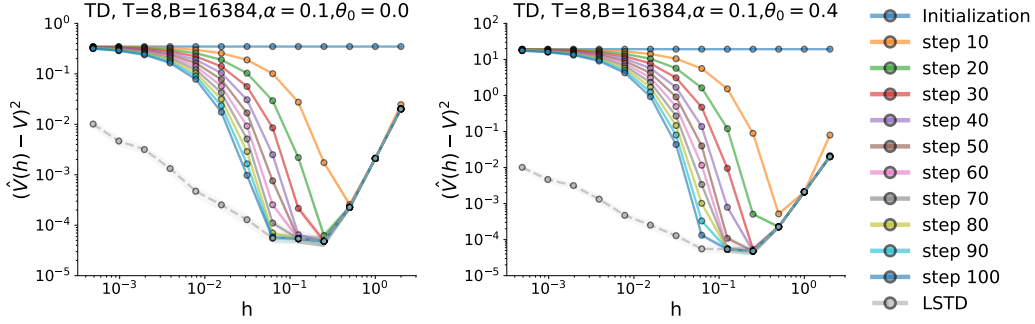Figure 6: Empirical MSE as a function of  $h$  as number of steps increase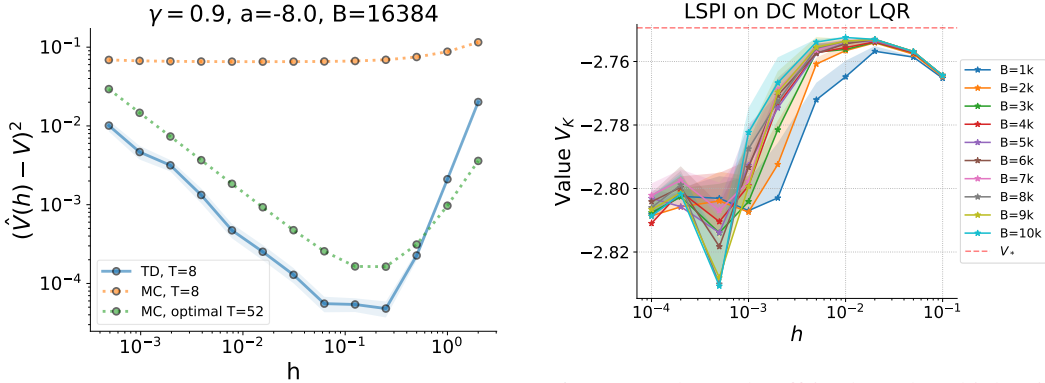

Figure 7: MSE of TD compared with MC

Figure 8: The trade-off in the value (higher is better) of controller  $K$  learned by LSPI

## 5.2 COMPARING THE VALUE ESTIMATION ACCURACY OF TD AND MONTE-CARLO

To gain more insights into the value estimation accuracy of TD and MC, we evaluate the MSE of TD with multi-step updates, and compare it against both MC with the same  $T$  and the theoretically optimal MSE\* that MC could achieve, in Figure 7. The optimal MC performance is obtained by optimizing the expression of its MSE w.r.t both  $T$  and  $h$ , which occurs at  $T \approx 52$ . The results show TD outperforms the optimal MC performance. This demonstrates that, when appropriately tuned, TD is a highly effective method for value estimation.

## 5.3 STOCHASTIC TD

Figure 9 illustrates that stochastic TD exhibits the same trade off with respect to the discretization step-size  $h$  in both the offline and online settings. In the offline setting (a), an “epoch” refers to one complete pass over the fixed dataset. In contrast, the online setting (b) operates with streaming data, where each step corresponds to an update using a sampled transition obtained at the current step. For each  $h$ , we perform a grid search over constant learning rates with iterate averaging, and report the MSE of the estimate corresponding to the best hyperparameters, averaged over 50 runs.

## 5.4 STOCHASTIC CONTROL IN LINEAR QUADRATIC SYSTEMS

To test whether the trade-off occurs beyond the prediction problem, we consider the control of a continuous-time stochastic LQR, modeling a DC motor, adapted from Lewis et al. (2012) (details in Appendix A.9). The objective is to find a linear controller  $K$  such that the control  $\mathbf{u}(t) = K\mathbf{x}(t)$  maximizes the infinite-horizon discounted value  $V_K$ . Following the experimental setup of Tu & Recht (2018), we collect offline data by running a Gaussian policy  $\mathbf{u} \sim \mathcal{N}(0, I_2)$  for 500 episodes of length 20 (10k samples in total, then sub-sampled to simulate smaller budgets). We then apply Least-Squares Policy Iteration (LSPI) (Lagoudakis & Parr, 2003; Tu & Recht, 2018), which alternates TD value estimation and policy improvement, yielding a controller  $K$  for each step size  $h$  and budget

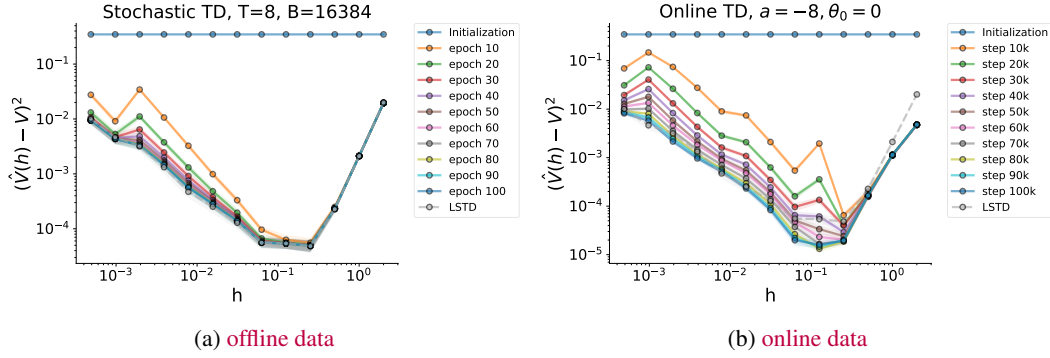

Figure 9: MSE of Stochastic TD(0) as a function of  $h$  for different numbers of updates

$B$ . Each setting is repeated over 50 runs, and we report the median performance  $V_K(h)$  (higher is better; optimal value  $V_*$ ), following the evaluation protocol in Tu & Recht (2018). The shaded region covers median-60th percentile range. Figure 8 shows a clear trade-off in control performance with respect to  $h$ , where the optimal step size  $h^*$  remains largely insensitive to the data budget  $B$ , mirroring our findings in the TD prediction setting.

## 6 LIMITATIONS AND FUTURE WORK

While our work provides a framework for understanding the impact of temporal resolution in TD, it has a limited scope. Our theoretical analysis of the trade-off is restricted to one-dimensional Langevin systems and the offline mean-path semi-gradient TD(0) algorithm. As a result, the extent to which our findings generalize to more complex dynamical systems and alternative TD algorithms remains an open question. Although we empirically observed a trade-off in stochastic TD in both online and offline settings, as well as in stochastic control using LSPI, it remains unclear how broadly these findings generalize to more complex dynamical systems and reward functions. Exploring how temporal resolution influences value estimation in higher-dimensional, nonlinear environments and different learning paradigms, is an important direction for future work.

## 7 CONCLUSION

In this work, we provided a theoretical and empirical investigation into the impact of temporal resolution on offline Temporal Difference value estimation. By analyzing the Mean-Squared Error of the mean-path semi-gradient TD(0) algorithm in continuous-time stochastic linear quadratic systems, we demonstrated the existence of a non-trivial trade-off in step size  $h$  where an optimal discretization improves estimation accuracy. Our analysis further revealed that unlike Monte Carlo estimation, where the optimal  $h$  scales polynomially with the data budget  $B$  (Zhang et al., 2023), the optimal  $h$  for TD remains largely invariant to  $B$ . This provides practical guidance: one can select an appropriate temporal resolution under small data budgets without re-tuning for larger data.

Through extensive numerical experiments, we verified our theoretical predictions and explored the behavior of TD estimation across various parameters and algorithmic settings, including offline mean-path TD, offline stochastic TD, and online stochastic TD. Additionally, we compared TD with MC and showed that TD can outperform MC under the same data budget. Finally, we demonstrated in a stochastic control setting that the step-size trade-off persists in policy learning using LSPI.

This work establishes a framework for analyzing the role of temporal resolution in TD methods, contributing to a deeper understanding of how step size influences learning dynamics. Future directions include extending this analysis to more complex environments, higher-dimensional systems, and alternative TD formulations.

## REPRODUCIBILITY STATEMENT

The assumptions underlying our theoretical results are stated in the main text, and complete proofs are provided in the Appendix. The supplementary materials contain the Mathematica scripts and

data used for symbolic computations supporting our analysis of one-step and multi-step MSE. To illustrate the complexity of the expressions, we also provide the exact formula for the one-step MSE. In addition, we include the Python code used to conduct the offline TD numerical experiments.

## REFERENCES

- Yasin Abbasi-Yadkori, Dávid Pál, and Csaba Szepesvári. Online least squares estimation with self-normalized processes: An application to bandit problems. *arXiv preprint arXiv:1102.2670*, 2011.
- Kavosh Asadi, Shoham Sabach, Yao Liu, Omer Gottesman, and Rasool Fakoor. Td convergence: An optimization perspective. *Advances in Neural Information Processing Systems*, 36, 2024.
- Leemon C Baird. Reinforcement learning in continuous time: Advantage updating. In *Proceedings of 1994 IEEE International Conference on Neural Networks (ICNN'94)*, volume 4, pp. 2448–2453. IEEE, 1994.
- Matteo Basei, Xin Guo, Anran Hu, and Yufei Zhang. Logarithmic regret for episodic continuous-time linear-quadratic reinforcement learning over a finite-time horizon. *Journal of Machine Learning Research*, 23(178):1–34, 2022.
- Jalaj Bhandari, Daniel Russo, and Raghav Singal. A finite time analysis of temporal difference learning with linear function approximation. In *Conference on learning theory*, pp. 1691–1692. PMLR, 2018.
- Steven J. Bradtke and Michael O. Duff. Reinforcement learning methods for continuous-time Markov decision problems. In *Advances in Neural Information Processing Systems*, 1994.
- Kaylee Burns, Tianhe Yu, Chelsea Finn, and Karol Hausman. Offline reinforcement learning at multiple frequencies. In *Conference on Robot Learning*, pp. 2041–2051. PMLR, 2023.
- Will Dabney, Georg Ostrovski, and Andre Barreto. Temporally extended  $\epsilon$ -greedy exploration. In *Proceedings of the International Conference on Learning Representations*, 2021.
- Sarah Dean, Horia Mania, Nikolai Matni, Benjamin Recht, and Stephen Tu. On the sample complexity of the linear quadratic regulator. *Foundations of Computational Mathematics*, 20(4):633–679, 2020.
- Kenji Doya. Reinforcement learning in continuous time and space. *Neural computation*, 12(1): 219–245, 2000.
- Homayoon Farrahi and A Rupam Mahmood. Reducing the cost of cycle-time tuning for real-world policy optimization. In *2023 International Joint Conference on Neural Networks (IJCNN)*, pp. 1–8. IEEE, 2023.
- Yunhan Huang and Quanyan Zhu. Infinite-horizon linear-quadratic-Gaussian control with costly measurements. *arXiv preprint arXiv:2012.14925*, 2020.
- Yunhan Huang, Veeraruna Kavitha, and Quanyan Zhu. Continuous-time Markov decision processes with controlled observations. In *2019 57th Annual Allerton Conference on Communication, Control, and Computing (Allerton)*, pp. 32–39. IEEE, 2019.
- Tommi Jaakkola, Michael Jordan, and Satinder Singh. Convergence of stochastic iterative dynamic programming algorithms. *Advances in neural information processing systems*, 6, 1993.
- Yanwei Jia and Xun Yu Zhou. Policy evaluation and temporal-difference learning in continuous time and space: A martingale approach. *Journal of Machine Learning Research*, 23(154):1–55, 2022a.
- Yanwei Jia and Xun Yu Zhou. Policy gradient and actor-critic learning in continuous time and space: Theory and algorithms. *Journal of Machine Learning Research*, 23(154):1–55, 2022b.
- Michail G Lagoudakis and Ronald Parr. Least-squares policy iteration. *The Journal of Machine Learning Research*, 4:1107–1149, 2003.

- Aravind S. Lakshminarayanan, Sahil Sharma, and Balaraman Ravindran. Dynamic action repetition for deep reinforcement learning. In *Proceedings of the AAAI Conference on Artificial Intelligence*, 2017.
- Chandrashekar Lakshminarayanan and Csaba Szepesvari. Linear stochastic approximation: How far does constant step-size and iterate averaging go? In *International Conference on Artificial Intelligence and Statistics*, pp. 1347–1355. PMLR, 09–11 Apr 2018.
- Frank L. Lewis, Draguna L. Vrabie, and Kyriakos G. Vamvoudakis. Reinforcement learning and feedback control: Using natural decision methods to design optimal adaptive controllers. *IEEE Control Systems*, 32:76–105, 2012.
- Anders Lindquist. Linear stochastic systems. *SIAM Review*, 32(2):325–328, 1990. doi: 10.1137/1032067.
- Michael Lutter, Boris Belousov, Shie Mannor, Dieter Fox, Animesh Garg, and Jan Peters. Continuous-time fitted value iteration for robust policies. *IEEE Transactions on Pattern Analysis and Machine Intelligence*, 2022.
- Marlos C Machado, Marc G Bellemare, Erik Talvitie, Joel Veness, Matthew Hausknecht, and Michael Bowling. Revisiting the arcade learning environment: Evaluation protocols and open problems for general agents. *Journal of Artificial Intelligence Research*, 61:523–562, 2018.
- Alberto Maria Metelli, Flavio Mazzolini, Lorenzo Bisi, Luca Sabbioni, and Marcello Restelli. Control frequency adaptation via action persistence in batch reinforcement learning. In *Proceedings of the International Conference on Machine Learning*, 2020.
- Seohong Park, Jaekyeom Kim, and Gunhee Kim. Time discretization-invariant safe action repetition for policy gradient methods. *Advances in Neural Information Processing Systems*, 34, 2021.
- Gandharv Patil, Prashanth L. A., Dheeraj Nagaraj, and Doina Precup. Finite time analysis of temporal difference learning with linear function approximation: Tail averaging and regularisation, 2024.
- Sahil Sharma, Aravind S. Lakshminarayanan, and Balaraman Ravindran. Learning to repeat: Fine grained action repetition for deep reinforcement learning. In *Proceedings of the International Conference on Learning Representations*, 2017.
- Richard S Sutton. Learning to predict by the methods of temporal differences. *Machine learning*, 3:9–44, 1988.
- Richard S. Sutton and Andrew G. Barto. *Reinforcement Learning: An Introduction*. The MIT Press, second edition, 2018.
- Richard S. Sutton, Doina Precup, and Santinder Singh. Between MDPs and semi-MDPs: A framework for temporal abstraction in reinforcement learning. *Artificial Intelligence*, 112:181–211, 1999.
- JN Tsitsiklis and B Van Roy. An analysis of temporal-difference learning with function approximation. *IEEE Transactions on Automatic Control*, 42(5):674–690, 1997.
- Stephen Tu and Benjamin Recht. Least-squares temporal difference learning for the linear quadratic regulator. In *International Conference on Machine Learning*, pp. 5005–5014. PMLR, 2018.
- Haoran Wang, Thaleia Zariphopoulou, and Xun Yu Zhou. Reinforcement learning in continuous time and space: A stochastic control approach. *Journal of Machine Learning Research*, 21(198): 1–34, 2020.
- Chenjun Xiao, Bo Dai, Jincheng Mei, Oscar A Ramirez, Ramki Gummadi, Chris Harris, and Dale Schuurmans. Understanding and leveraging overparameterization in recursive value estimation. In *International Conference on Learning Representations*, 2021.
- Zichen Zhang, Johannes Kirschner, Junxi Zhang, Francesco Zanini, Alex Ayoub, Masood Dehghan, and Dale Schuurmans. Managing temporal resolution in continuous value estimation: A fundamental trade-off. In *Advances in Neural Information Processing Systems*, volume 36, pp. 62519–62548, 2023.

## A APPENDIX

### A.1 PARAMETERS USED FOR THE EXAMPLE IN FIG. 1

The parameters that we use in the example are:  $a = -8, T = 8, B = 16384, \sigma = 1, \gamma = 0.9, \alpha = 0.1$ . The two plots differ in their initialization of  $\theta$ :  $\theta_0 = 0$  for the left and  $\theta_0 = 0.4$  for the right. We run the offline mean-path semi-gradient TD(0) algorithm described in Appendix 3.3 under each  $h$  for 10 updates. The result is averaged across 50 runs and shaded area is the standard error.

### A.2 PROOF OF THEOREM 4.1

In this section, we provide the technical derivations that support the theoretical results in Appendix 4. We begin by stating key lemmas related to the moments of the stochastic process, which form the basis of the MSE derivation. We then derive the exact MSE after one-step update, followed by an approximate form for multi-step updates, to highlight the dependence on the step-size  $h$ .

The analysis of the MSE needs a clear understanding of  $\mathbb{E}[\theta_t^2]$  and  $\mathbb{E}[\theta_t]$ . We shall first state the following lemma that is used in the computation.

**Lemma A.1.** (Even moments) Let  $x(t) = \sigma \int_0^t e^{a(t-s)} dw(s)$  be the solution of the Langevin equation, the moments of  $x(t)$  is given by

$$\mathbb{E}[x^{2n}(t)] = \frac{(2n-1)!!\sigma^{2n}}{(2a)^n} (e^{2at} - 1)^n, \quad (11)$$

The joint moments, e.g.  $\mathbb{E}[x^{2n}(t)x^{2m}(s)]$  for  $s \leq t$  and all nonnegative integers  $m, n$  can be derived from Equation 11.

*Proof.* Equation 11 can be derived using induction and Itô's formula as follows.

Let  $f(x) = x^{2n}$ , by Itô's formula, we have

$$df(x(t)) = f'(x(t))dx(t) + \frac{1}{2}f''(x(t))d[x, x]_t.$$

Substituting  $f'(x) = 2nx^{2n-1}$ ,  $f''(x) = 2n(2n-1)x^{2n-2}$  and  $dx(t) = ax(t)dt + \sigma dw(t)$ , one has

$$df(x(t)) = 2nx^{2n-1}(t)(ax(t)dt + \sigma dw(t)) + \frac{1}{2}2n(2n-1)x^{2n-2}(t)\sigma^2 dt.$$

Noticing the stochastic integral has zero expectation ( $\mathbb{E}[x^{2n-1}(t)dw(t)] = 0$ ), the expectation of the above equation gives

$$\frac{d}{dt}\mathbb{E}[x^{2n}(t)] = 2na\mathbb{E}[x^{2n}(t)] + n(2n-1)\sigma^2\mathbb{E}[x^{2n-2}(t)]. \quad (12)$$

Taking  $M_n(t) = \mathbb{E}[x^{2n}(t)]$ , the above equation gives

$$\frac{dM_n(t)}{dt} = 2naM_n(t) + n(2n-1)\sigma^2 M_{n-1}(t). \quad (13)$$

Now, we show  $M_n(t) = \frac{(2n-1)!!\sigma^{2n}}{(2a)^n} (e^{2at} - 1)^n$  by induction using the above recurrence form.

It is trivial when  $n = 1$ . Assume for some  $n \geq 1$ ,  $M_n(t) = \frac{(2n-1)!!\sigma^{2n}}{(2a)^n} (e^{2at} - 1)^n$  holds. By Equation 13

$$\begin{aligned} \frac{dM_{n+1}(t)}{dt} &= 2(n+1)aM_{n+1}(t) + (n+1)(2n+1)\sigma^2 M_n(t) \\ &= 2(n+1)aM_{n+1}(t) + (n+1)(2n+1)\sigma^2 \frac{(2n-1)!!\sigma^{2n}}{(2a)^n} (e^{2at} - 1)^n. \end{aligned} \quad (14)$$

We solve this linear ODE with integrating factor  $e^{-2(n+1)at}$  and obtain

$$\frac{d}{dt} \left( e^{-2(n+1)at} M_{n+1}(t) \right) = (n+1)(2n+1)\sigma^2 \frac{(2n-1)!!}{(2a)^n} e^{-2(n+1)at} (e^{2at} - 1)^n.$$



Integrating both sides from 0 to  $t$ ,

$$\left(e^{-2(n+1)at} M_{n+1}(t)\right) = (n+1)(2n+1)\sigma^{2(n+1)} \frac{(2n-1)!!}{(2a)^n} \int_0^t e^{-2(n+1)as} (e^{2as} - 1)^n ds,$$

which can be solved directly using change of variables (e.g.,  $z = e^{2as} - 1$ ), and therefore we obtain

$$M_{n+1}(t) = \mathbb{E} \left[ x^{2(n+1)}(t) \right] = \frac{(2n+1)!! \sigma^{2(n+1)}}{(2a)^{n+1}} (e^{2at} - 1)^{n+1},$$

which complete the proof of Equation 11.

To derive the joint moments  $\mathbb{E} [x^{2n}(t)x^{2m}(s)]$  for  $s \leq t$  and all nonnegative integers  $m, n$ , we simply decompose  $x(t) = x(s) + \sigma \int_s^t e^{a(t-u)} dw(u)$ . Then

$$\begin{aligned} \mathbb{E} [x^{2n}(t)x^{2m}(s)] &= \mathbb{E} \left[ \left( x(s) + \sigma \int_s^t e^{a(t-u)} dw(u) \right)^{2n} x^{2m}(s) \right] \\ &= \sum_{k=0}^n \binom{2n}{2k} \mathbb{E} [x^{2(m+k)}(s)] \mathbb{E} \left[ \left( \sigma \int_s^t e^{a(t-u)} dw(u) \right)^{2(n-k)} \right]. \end{aligned}$$

Both the terms  $\mathbb{E} [x^{2(m+k)}(s)]$  and  $\mathbb{E} \left[ \left( \sigma \int_s^t e^{a(t-u)} dw(u) \right)^{2(n-k)} \right]$  can be computed in exactly the same way as the computation of Equation 11.

Similarly, the general form  $\mathbb{E} [x_1^{2n_1}(t_1)x_2^{2n_2}(t_2) \cdots x_k^{2n_k}(t_k)]$  can be computed in the same manner by first sorting  $t_1, \dots, t_k$ .  $\square$

To characterize the MSE in Equation 5, let's start by analyzing one update, i.e., when  $t = 1$ . The result is in the following lemma:

**Lemma A.2.** (One-step MSE) The MSE after one-step update ( $t = 1$ ) is:

$$\begin{aligned} \text{MSE}_1 &= \frac{\sigma^4}{(\ln \gamma)^2} \left( (1 + 2\alpha\mathcal{I}_2 + \alpha^2\mathcal{I}_4)\theta_0^2 + \left( \frac{1}{\ln \gamma + 2a} \right)^2 \right. \\ &\quad \left. + 2\alpha(\mathcal{I}_1 + \alpha\mathcal{I}_5)\theta_0 + \alpha^2\mathcal{I}_3 - 2\frac{\theta_0 + \alpha(\mathcal{I}_1 + \mathcal{I}_2\theta_0)}{\ln \gamma + 2a} \right). \end{aligned}$$

where the quantities  $\mathcal{I}_1, \dots, \mathcal{I}_5$  are auxiliary expectation terms introduced in the proof.

*Proof.* Since  $\theta_1 = \theta_0 + \alpha\bar{g}(\theta_0)$ , we have  $\mathbb{E}[\hat{\theta}] = \mathbb{E}[\theta_1] = \theta_0 + \alpha\mathbb{E}[\bar{g}(\theta_0)]$ .

We can rewrite Equation 4 as

$$\mathbb{E}[\bar{g}(\theta_0)] = \mathbb{E} \left[ \overline{\phi r} + \overline{\phi(\gamma^h \phi' - \phi)} \theta_0 \right] \tag{15}$$

$$= \underbrace{\mathbb{E} [\overline{\phi r}]}_{\mathcal{I}_1} + \underbrace{\mathbb{E} [\overline{\phi(\gamma^h \phi' - \phi)}]}_{\mathcal{I}_2} \theta_0 \tag{16}$$

We can write out the two terms in Equation (16). For the first term,

$$\begin{aligned}
\mathcal{I}_1 &= \mathbb{E} [\overline{\phi r}] = \mathbb{E} \left[ \frac{1}{M} \sum_{i=1}^M \frac{1}{N-1} \sum_{k=0}^{N-2} \phi(x_i(kh)) r_i(kh) \right] \\
&= \frac{1}{M} \sum_{i=1}^M \frac{1}{N-1} \sum_{k=0}^{N-2} \mathbb{E} [\phi(x_i(kh)) r_i(kh)] \\
&= \frac{1}{N-1} \sum_{k=0}^{N-2} \mathbb{E} [\phi(x(kh)) r(kh)] \\
&= -\frac{h}{N-1} \sum_{k=0}^{N-2} \left\{ \mathbb{E} [x^4(kh)] - \frac{\sigma^2}{\ln \gamma} \mathbb{E} [x^2(kh)] \right\} \\
&= -\frac{h\sigma^4}{2a(N-1)} \sum_{k=0}^{N-2} \left\{ \left[ \frac{3}{2a} (e^{2akh} - 1)^2 \right] - \left[ \frac{1}{\ln \gamma} (e^{2akh} - 1) \right] \right\}
\end{aligned} \tag{17}$$

By taking the summation,  $\mathcal{I}_1$  can be written as

$$\mathcal{I}_1 = -\frac{h\sigma^4}{2a(N-1)} \left[ (N-1) \left( \frac{3}{2a} + \frac{1}{\ln \gamma} \right) - \left( \frac{3}{a} + \frac{1}{\ln \gamma} \right) \frac{1 - e^{2a(T-h)}}{1 - e^{2ah}} + \frac{3}{2a} \frac{1 - e^{4a(T-h)}}{1 - e^{4ah}} \right] \tag{18}$$

For the second term  $\mathcal{I}_2$ ,

$$\begin{aligned}
\mathcal{I}_2 &= \mathbb{E} [\overline{\phi(\gamma^h \phi' - \phi)}] \\
&= \mathbb{E} \left[ \frac{1}{M} \sum_{i=1}^M \frac{1}{N-1} \sum_{k=0}^{N-2} \phi(x_i(kh)) (\gamma^h \phi(x_i(kh+h)) - \phi(x_i(kh))) \right]
\end{aligned} \tag{19}$$

$$= \frac{1}{M} \sum_{i=1}^M \frac{1}{N-1} \sum_{k=0}^{N-2} \mathbb{E} [\phi(x_i(kh)) (\gamma^h \phi(x_i(kh+h)) - \phi(x_i(kh)))] \tag{20}$$

$$= \frac{1}{N-1} \sum_{k=0}^{N-2} \mathbb{E} [\phi(x(kh)) (\gamma^h \phi(x(kh+h)) - \phi(x(kh)))] \tag{21}$$

$$\begin{aligned}
&= \frac{1}{N-1} \sum_{k=0}^{N-2} \left\{ \gamma^h \mathbb{E} [x^2(kh) x^2(kh+h)] + \frac{\sigma^4}{(\ln \gamma)^2} (\gamma^h - 1) - \mathbb{E} [x^4(kh)] \right. \\
&\quad \left. + \frac{\sigma^2}{\ln \gamma} ((2 - \gamma^h) \mathbb{E} [x^2(kh)] - \gamma^h \mathbb{E} [x^2(kh+h)]) \right\}
\end{aligned} \tag{22}$$

Substituting the moments from Lemma A.1, we have

$$\begin{aligned}
\mathcal{I}_2 &= \frac{1}{N-1} \sum_{k=0}^{N-2} \left\{ \gamma^h \frac{\sigma^4}{4a^2} (e^{2akh} - 1) e^{2ah} [(1 - e^{-2ah}) + 3(e^{2akh} - 1)] \right. \\
&\quad + \frac{\sigma^4}{(\ln \gamma)^2} (\gamma^h - 1) - \frac{3\sigma^4}{4a^2} (e^{2akh} - 1)^2 \\
&\quad \left. + \frac{\sigma^4}{2a \ln \gamma} ((2 - \gamma^h) (e^{2akh} - 1) - \gamma^h (e^{2a(k+1)h} - 1)) \right\},
\end{aligned} \tag{23}$$

which can be computed and simplified symbolically using *Mathematica*.

On the other hand,  $\mathbb{E} [\theta_1^2] = \theta_0^2 + 2\theta_0 \alpha \mathbb{E} [\bar{g}(\theta_0)] + \alpha^2 \mathbb{E} [\bar{g}^2(\theta_0)]$ , we need to compute  $\mathbb{E} [\bar{g}^2(\theta_0)]$  to find the MSE. By definition,

$$\mathbb{E} [\bar{g}^2(\theta_0)] = \underbrace{\mathbb{E} [\overline{(\phi r)^2}]}_{\mathcal{I}_3} + \underbrace{\theta_0^2 \mathbb{E} [\overline{(\phi(\gamma^h \phi' - \phi))^2}]}_{\mathcal{I}_4} + \underbrace{2\theta_0 \mathbb{E} [\overline{(\phi r)(\phi(\gamma^h \phi' - \phi))}]}_{\mathcal{I}_5}, \tag{24}$$

where each term can be computed as follows.

$$\begin{aligned}
\mathcal{I}_3 &= \mathbb{E} [(\overline{\phi r})^2] \\
&= \mathbb{E} \left[ \frac{1}{(B-M)^2} \left( \sum_{i=1}^M \sum_{k=0}^{N-2} [\phi(x_i(kh))r_i(kh)] \right)^2 \right] \\
&= \mathbb{E} \left[ \frac{h^2}{(B-M)^2} \left( \sum_{i=1}^M \sum_{k=0}^{N-2} \left[ \left( x_i^2(kh) - \frac{\sigma^2}{\ln \gamma} \right) x_i^2(kh) \right] \right)^2 \right] \\
&= \frac{h^2 N}{B(N-1)^2} \left[ \sum_{k=0}^{N-2} \sum_{\ell=0}^{N-2} \mathbb{E} \left[ \left( x^2(kh) - \frac{\sigma^2}{\ln \gamma} \right) x^2(kh) \left( x^2(\ell h) - \frac{\sigma^2}{\ln \gamma} \right) x^2(\ell h) \right] \right. \\
&\quad \left. + (M-1) \left( \sum_{k=0}^{N-2} \mathbb{E} \left[ \left( x^2(kh) - \frac{\sigma^2}{\ln \gamma} \right) x^2(kh) \right] \right)^2 \right] \tag{25}
\end{aligned}$$

where each expectation can be computed from Lemma A.1 and summation can be computed symbolically from *Mathematica*.

Similarly,

$$\begin{aligned}
\mathcal{I}_4 &= \mathbb{E} \left[ \left( \frac{1}{M} \sum_{i=1}^M \frac{1}{N-1} \sum_{k=0}^{N-2} \phi(x_i(kh))(\gamma^h \phi(x_i(kh+h)) - \phi(x_i(kh))) \right)^2 \right] \\
&= \frac{N}{B(N-1)^2} \left[ \sum_{k=0}^{N-2} \sum_{\ell=0}^{N-2} \mathbb{E} [\phi(x(kh))(\gamma^h \phi(x(kh+h)) - \phi(x(kh))) \right. \\
&\quad \left. \phi(x(\ell h))(\gamma^h \phi(x(\ell h+h)) - \phi(x(\ell h)))] + \right. \\
&\quad \left. \frac{(M-1)}{(N-1)^2} \left[ \sum_{k=0}^{N-2} \sum_{\ell=0}^{N-2} \mathbb{E} [\phi(x(kh))(\gamma^h \phi(x(kh+h)) - \phi(x(kh)))] \right. \right. \\
&\quad \left. \left. \mathbb{E} [\phi(x(\ell h))(\gamma^h \phi(x(\ell h+h)) - \phi(x(\ell h)))] \right] \right], \tag{26}
\end{aligned}$$

and

$$\begin{aligned}
\mathcal{I}_5 &= \mathbb{E} \left[ \left( \frac{1}{M} \sum_{i=1}^M \frac{1}{N-1} \sum_{k=0}^{N-2} [\phi(x_i(kh))r_i(kh)] \right) \right. \\
&\quad \left. \left( \frac{1}{M} \sum_{i=1}^M \frac{1}{N-1} \sum_{k=0}^{N-2} \phi(x_i(kh))(\gamma^h \phi(x_i(kh+h)) - \phi(x_i(kh))) \right) \right] \\
&= \frac{N}{B(N-1)^2} \left[ \sum_{k=0}^{N-2} \sum_{\ell=0}^{N-2} \mathbb{E} [\phi(x(kh))r(kh)\phi(x(\ell h))(\gamma^h \phi(x(\ell h+h)) - \phi(x(\ell h)))] + \right. \\
&\quad \left. \frac{(M-1)}{(N-1)^2} \left[ \sum_{k=0}^{N-2} \sum_{\ell=0}^{N-2} \mathbb{E} [\phi(x(kh))r(kh)] \mathbb{E} [\phi(x(\ell h))(\gamma^h \phi(x(\ell h+h)) - \phi(x(\ell h)))] \right] \right]. \tag{27}
\end{aligned}$$

By employing Lemma A.1 and the computation from *Mathematica*, one can derive the MSE after one-step update as

$$\begin{aligned} \text{MSE}_1 &= \frac{\sigma^4}{(\ln \gamma)^2} \left( (2\alpha + 1)\theta_0^2 + 2\theta_0\alpha^2(\mathcal{I}_1 + \mathcal{I}_2\theta_0) + \alpha^2(\mathcal{I}_3 + \mathcal{I}_4\theta_0^2 + 2\theta_0\mathcal{I}_5) \right. \\ &\quad \left. - 2\frac{\theta_0 + \alpha(\mathcal{I}_1 + \mathcal{I}_2\theta_0)}{\ln \gamma + 2a} + \left( \frac{1}{\ln \gamma + 2a} \right)^2 \right). \\ &= \frac{\sigma^4}{(\ln \gamma)^2} \left( (1 + 2\alpha\mathcal{I}_2 + \alpha^2\mathcal{I}_4)\theta_0^2 + 2\alpha(\mathcal{I}_1 + \alpha\mathcal{I}_5)\theta_0 + \alpha^2\mathcal{I}_3 \right. \\ &\quad \left. - 2\frac{\theta_0 + \alpha(\mathcal{I}_1 + \mathcal{I}_2\theta_0)}{\ln \gamma + 2a} + \left( \frac{1}{\ln \gamma + 2a} \right)^2 \right). \end{aligned}$$

□

We now generalize the one-step update to the case of  $t$ -step updates. Recall that the update rule (Equation 3) is  $\theta_{t+1} = \theta_t + \alpha\bar{g}(\theta_t)$ . To derive the MSE after  $t$ -steps update, we first express  $\theta_t$  in terms of the initial parameter  $\theta_0$  by repeated substitution. This recursive expansion is provided by the following lemma.

**Lemma A.3** (Expansion of  $\theta_t$ ). *The parameter  $\theta_t$  after  $t$  updates satisfies:*

$$\theta_t = \theta_0 + \sum_{\ell=1}^t \binom{t}{\ell} \alpha^\ell \left[ \overline{\phi(\gamma^h \phi' - \phi)} \right]^{\ell-1} \left[ \overline{\phi r} + \overline{\phi(\gamma^h \phi' - \phi)} \theta_0 \right]. \quad (28)$$

*Proof.* By induction, if Equation 28 is true, then

$$\begin{aligned} \theta_{t+1} &= \theta_t + \alpha \left( \overline{\phi r} + \overline{\phi(\gamma^h \phi' - \phi)} \theta_t \right) \\ &= \theta_0 + \sum_{\ell=1}^t \binom{t}{\ell} \alpha^\ell \left[ \overline{\phi(\gamma^h \phi' - \phi)} \right]^{\ell-1} \left[ \overline{\phi r} + \overline{\phi(\gamma^h \phi' - \phi)} \theta_0 \right] \\ &\quad + \alpha \left[ \overline{\phi r} + \overline{\phi(\gamma^h \phi' - \phi)} \theta_0 \right] \\ &\quad + \sum_{\ell=1}^t \binom{t}{\ell} \alpha^{\ell+1} \left[ \overline{\phi(\gamma^h \phi' - \phi)} \right]^\ell \left[ \overline{\phi r} + \overline{\phi(\gamma^h \phi' - \phi)} \theta_0 \right]. \end{aligned}$$

Rearrange the indices for the two summations,

$$\begin{aligned} \theta_{t+1} &= \theta_0 + (t+1)\alpha \left[ \overline{\phi r} + \overline{\phi(\gamma^h \phi' - \phi)} \theta_0 \right] \\ &\quad + \sum_{\ell=2}^t \binom{t}{\ell} \alpha^\ell \left[ \overline{\phi(\gamma^h \phi' - \phi)} \right]^{\ell-1} \left[ \overline{\phi r} + \overline{\phi(\gamma^h \phi' - \phi)} \theta_0 \right] \\ &\quad + \sum_{\ell=2}^t \binom{t}{\ell-1} \alpha^\ell \left[ \overline{\phi(\gamma^h \phi' - \phi)} \right]^{\ell-1} \left[ \overline{\phi r} + \overline{\phi(\gamma^h \phi' - \phi)} \theta_0 \right] \\ &= \theta_0 + \sum_{\ell=1}^{t+1} \binom{t+1}{\ell} \alpha^\ell \left[ \overline{\phi(\gamma^h \phi' - \phi)} \right]^{\ell-1} \left[ \overline{\phi r} + \overline{\phi(\gamma^h \phi' - \phi)} \theta_0 \right]. \end{aligned}$$

where the last equation is a direct application of Pascal's formula. This completes the proof. □

By straightforward manipulation, the formula can be rewritten as

$$\theta_t = [1 + \alpha(\overline{\phi(\gamma^h \phi' - \phi)})]^t \theta_0 + \alpha \overline{\phi r} \sum_{j=0}^{t-1} [1 + \alpha(\overline{\phi(\gamma^h \phi' - \phi)})]^j.$$

Recall from Equation 5 that the MSE after t-step update is

$$\text{MSE}_t = \frac{\sigma^4}{(\ln \gamma)^2} \left( \mathbb{E}[\theta_t^2] - 2 \frac{1}{\ln \gamma + 2a} \mathbb{E}[\theta_t] + \left( \frac{1}{\ln \gamma + 2a} \right)^2 \right), \quad (29)$$

where

$$\theta_t = \theta_0 + \sum_{\ell=1}^t \binom{t}{\ell} \alpha^\ell \left[ \overline{\phi(\gamma^h \phi' - \phi)} \right]^{\ell-1} \left[ \overline{\phi r} + \overline{\phi(\gamma^h \phi' - \phi)} \theta_0 \right]. \quad (30)$$

by Lemma A.3. The exact computation in this case cannot be obtained as we did in the one-step case, since  $\mathbb{E}[\theta_t^2]$  and  $\mathbb{E}[\theta_t]$  cannot be easily derived. We shall consider these quantities using approximation in order to give a clear insight of  $\text{MSE}_t$ .

**Lemma A.4** (Order of Higher Moments in Gradient Terms). *For small  $h \in (0, 1)$ , the following hold for all integers  $n \geq 3$ :*

$$\begin{aligned} \mathbb{E} \left[ \left( \overline{\phi(\gamma^h \phi' - \phi)} \right)^n \right] &= \mathcal{O}(h^n), \\ \mathbb{E} \left[ \left( \overline{\phi(\gamma^h \phi' - \phi)} \right)^{n-1} \overline{\phi r} \right] &= \mathcal{O}(h^n), \\ \mathbb{E} \left[ \left( \overline{\phi(\gamma^h \phi' - \phi)} \right)^{n-2} (\overline{\phi r})^2 \right] &= \mathcal{O}(h^n), \end{aligned}$$

*Proof.* We begin with the following expansion from applying Taylor expansion on  $\gamma^h$ :

$$\begin{aligned} &\gamma^h \phi(x(kh + h)) - \phi(x(kh)) \\ &= [\phi(x(kh + h)) - \phi(x(kh))] + h \ln \gamma \phi(x(kh + h)) + h^2 (\ln \gamma)^2 \phi(x(kh + h)) + \mathcal{O}(h^3) \end{aligned}$$

A direct expansion of  $(\gamma^h \phi(x(kh + h)) - \phi(x(kh)))^n$  will be the summation of

$$[\phi(x(kh + h)) - \phi(x(kh))]^{n_1} (h \ln \gamma \phi(x(kh + h)))^{n_2} (h^2 (\ln \gamma)^2 \phi(x(kh + h)))^{n_3} + \mathcal{O}(h^3),$$

with  $n_1 + n_2 + n_3 = n$ . Noticing that  $[\phi(x(kh + h)) - \phi(x(kh))]$  will contribute one factor  $h$ , therefore the leading order of  $\mathbb{E} \left[ \left( \overline{\phi(\gamma^h \phi' - \phi)} \right)^n \right] = \mathcal{O}(h^n)$  will have the power of  $h$  at least  $n_1 + n_2 + n_3 = n$ . The second and the third equations can be shown similarly by noticing  $\overline{\phi r}$  has a factor  $h$ .  $\square$

This lemma shows that the high-order moments of the TD update components vanish rapidly with small  $h$ . As a result, when analyzing the MSE, truncating at  $\mathcal{O}(h^3)$  suffices for a valid approximation.

Based on Lemma A.4, we immediately have

$$\mathbb{E}[\theta_t] = \theta_0 + t\alpha(\mathcal{I}_1 + \mathcal{I}_2\theta_0) + \frac{t(t-1)}{2}\alpha^2(\mathcal{I}_5 + \mathcal{I}_4\theta_0) + \mathcal{O}(h^3), \quad (31)$$

$$\mathbb{E}[\theta_t^2] = t^2\alpha^2\mathcal{I}_3 + t\alpha\theta_0(2\mathcal{I}_1 + (3t-1)\alpha\mathcal{I}_5) + \theta_0^2(1 + 2t\alpha\mathcal{I}_2 + t(2t-1)\alpha^2\mathcal{I}_4) + \mathcal{O}(h^3). \quad (32)$$

Therefore, we can write the MSE after t-step update as

$$\begin{aligned} \text{MSE}_t &= \frac{\sigma^4}{(\ln \gamma)^2} \left[ (t^2\alpha^2\mathcal{I}_3 + t\alpha\theta_0(2\mathcal{I}_1 + (3t-1)\alpha\mathcal{I}_5) + \theta_0^2(1 + 2t\alpha\mathcal{I}_2 + t(2t-1)\alpha^2\mathcal{I}_4)) \right. \\ &\quad \left. - 2 \frac{1}{\ln \gamma + 2a} \left( \theta_0 + t\alpha(\mathcal{I}_1 + \mathcal{I}_2\theta_0) + \frac{t(t-1)}{2}\alpha^2(\mathcal{I}_5 + \mathcal{I}_4\theta_0) \right) \right. \\ &\quad \left. + \left( \frac{1}{\ln \gamma + 2a} \right)^2 \right] + \mathcal{O}(h^3) \end{aligned} \quad (33)$$



which can be solved by the computation of  $\mathcal{I}_1, \dots, \mathcal{I}_5$ .

Although the exact forms of  $\mathcal{I}_1, \dots, \mathcal{I}_5$  can be obtained by symbolic computation in *Mathematica*, it is too complex to parse. To interpret the relationship between the MSE and  $h$  clearly, we shall approximate  $\mathcal{I}_1, \dots, \mathcal{I}_5$  in terms of  $h$ .

**Lemma A.5** (Approximation of  $I_i$  terms). *For small  $h \in (0, 1)$ , the quantities  $I_i$  can be expanded as follows:*

$$\mathcal{I}_1 = C_{11}h + C_{12}h^2 + \mathcal{O}(h^3), \quad (34)$$

$$\mathcal{I}_2 = C_{21}h + C_{22}h^2 + \mathcal{O}(h^3), \quad (35)$$

$$\mathcal{I}_3 = \frac{C_{31}}{B}h + \left( \frac{C_{320}}{B} + C_{321} \right) h^2 + \mathcal{O}(h^3), \quad (36)$$

$$\mathcal{I}_4 = \frac{C_{41}}{B}h + \left( \frac{C_{420}}{B} + C_{421} \right) h^2 + \mathcal{O}(h^3), \quad (37)$$

$$\mathcal{I}_5 = \frac{C_{51}}{B}h + \left( \frac{C_{520}}{B} + C_{521} \right) h^2 + \mathcal{O}(h^3), \quad (38)$$

where coefficients  $C_{ij}$  and  $C_{ijk}$  depends on  $a, \gamma, \sigma$  and  $T$ , but are independent of  $h$  and the data budget  $B$ . The expressions for each coefficient are listed below.

(i)

$$C_{11} = -\frac{\sigma^4 (4a - 4ae^{2aT} + 8a^2T + 3 \ln \gamma (3 - 4e^{2aT} + e^{4aT} + 4aT))}{16a^3T \ln \gamma}, \quad (39)$$

$$C_{21} = -(2a + \ln \gamma)C_{11}, \quad (40)$$

$$C_{321} = C_{11}^2, \quad (41)$$

$$C_{421} = (2a + \ln \gamma)^2 C_{11}^2, \quad (42)$$

$$C_{521} = -(2a + \ln \gamma)C_{11}^2 \quad (43)$$

(ii)

$$\begin{aligned} C_{31} = & \frac{\sigma^8 (5 - e^{4aT} + 4aT - 4e^{2aT} + 8aTe^{2aT})}{8a^4T(\ln \gamma)^2} + \\ & \frac{3\sigma^8 (11 + e^{6aT} + 8aT - 9e^{2aT} + 20aTe^{2aT} - 3e^{4aT} - 4aTe^{4aT})}{8a^5T \ln \gamma} + \\ & \frac{\sigma^8 (61 + 29e^{6aT} - 3e^{8aT} + 42aT - 18e^{4aT} - 90aTe^{4aT} - 69e^{2aT} + 108aTe^{2aT})}{8a^6T}, \end{aligned} \quad (44)$$

$$C_{41} = (\ln \gamma + 2a)^2 C_{31}, \quad (45)$$

$$C_{51} = -(\ln \gamma + 2a)C_{31}. \quad (46)$$

(iii)

$$\begin{aligned}
C_{320} = & \frac{\sigma^8 (4e^{2aT}(1 - 2aT + 3a^2T^2) + e^{4aT}(3aT - 1) - aT - 5)}{4a^4T^2(\ln \gamma)^2} \\
& + \frac{3\sigma^8 (e^{6aT}(9aT - 2) + 2e^{4aT}(3 - 8aT - 12a^2T^2))}{8a^5T^2 \ln \gamma} \\
& + \frac{3\sigma^8 (e^{2aT}(18 - 37aT + 60a^2T^2) - 4aT - 22)}{8a^5T^2 \ln \gamma} \\
& + \frac{\sigma^8 (6e^{8aT}(1 - 6aT) + 29e^{6aT}(-2 + 9aT) + 9e^{4aT}(4 - 7aT - 60a^2T^2))}{8a^6T^2} \\
& + \frac{\sigma^8 (3e^{2aT}(46 - 87aT + 108a^2T^2) - 21aT - 122)}{8a^6T^2}, \tag{47}
\end{aligned}$$

$$C_{420} = (2a + \ln \gamma)^2 C_{320}^2, \tag{48}$$

$$C_{520} = -(2a + \ln \gamma) C_{320}^2. \tag{49}$$

(iv)

$$\begin{aligned}
C_{12} = & -\frac{\sigma^4 (1 - e^{2aT} - aT + 3aTe^{2aT})}{4a^2T^2 \ln \gamma} \\
& - \frac{3\sigma^4 (3 - 4e^{2aT} + e^{4aT} - 2aT + 12aTe^{2aT} - 6aTe^{4aT})}{16a^3T^2}, \tag{50}
\end{aligned}$$

$$C_{22} = -(2a + \ln \gamma)C_{12} + C_{23}, \tag{51}$$

$$C_{23} = \frac{3\sigma^4(2a + \ln \gamma)^2(3 - 4e^{2aT} + e^{4aT} + 4aT)}{32a^3T}. \tag{52}$$

*Proof.* By relying on the previous computations of  $\mathcal{I}_1, \dots, \mathcal{I}_5$ , we can derive the approximations using Taylor expansion at  $h$ .

For  $\mathcal{I}_1$ , we take the expansion of Equation 18 with the relationship that  $T = Nh$  to obtain the following directly.

$$C_{11} = -\frac{\sigma^4}{2a} \left\{ \left( \frac{3}{2a} + \frac{1}{\ln \gamma} \right) + \left( \frac{3}{a} + \frac{1}{\ln \gamma} \right) \frac{(1 - e^{2aT})}{2aT} + \frac{3(e^{4aT} - 1)}{8a^2T} \right\} \tag{53}$$

$$= -\frac{\sigma^4 (4a - 4ae^{2aT} + 8a^2T + 3 \ln \gamma (3 - 4e^{2aT} + e^{4aT} + 4aT))}{16a^3T \ln \gamma}, \tag{54}$$

$$\begin{aligned}
C_{12} = & -\frac{\sigma^4}{2a} \left\{ \left( \frac{3}{a} + \frac{1}{\ln \gamma} \right) \frac{(1 - e^{2aT} - aT + 3aTe^{2aT})}{2aT^2} - \frac{3(1 - e^{4aT} - 2aT + 6ae^{4aT})}{8a^2T^2} \right\} \\
& = -\frac{\sigma^4 (1 - e^{2aT} - aT + 3aTe^{2aT})}{4a^2T^2 \ln \gamma} \\
& - \frac{3\sigma^4 (3 - 4e^{2aT} + e^{4aT} - 2aT + 12aTe^{2aT} - 6aTe^{4aT})}{16a^3T^2}. \tag{55}
\end{aligned}$$

$$\begin{aligned}
& = -\frac{\sigma^4 (1 - e^{2aT} - aT + 3aTe^{2aT})}{4a^2T^2 \ln \gamma} \\
& - \frac{3\sigma^4 (3 - 4e^{2aT} + e^{4aT} - 2aT + 12aTe^{2aT} - 6aTe^{4aT})}{16a^3T^2}. \tag{56}
\end{aligned}$$

For  $\mathcal{I}_2$ , we first use the expansion that  $\gamma^h = 1 + h \ln \gamma + h^2(\ln \gamma)^2 + \mathcal{O}(h^3)$  to rewrite  $\mathcal{I}_2$  as

$$\begin{aligned}
\mathcal{I}_2 &= \mathbb{E} \left[ \overline{\phi(\gamma^h \phi' - \phi)} \right] \\
&= \mathbb{E} \left[ \overline{\phi(\phi' - \phi)} \right] + \mathbb{E} \left[ \overline{\phi \phi'} \right] (h \ln \gamma + h^2(\ln \gamma)^2 + \mathcal{O}(h^3)), \tag{57}
\end{aligned}$$

the terms of each can be derived as follows.

$$\begin{aligned}
& \mathbb{E} [\overline{\phi(\phi' - \phi)}] \\
&= \frac{1}{N-1} \sum_{k=0}^{N-1} \left( \mathbb{E} [x^2(kh)x^2(kh+h) - x^4(kh)] - \frac{\sigma^2}{\ln \gamma} \mathbb{E} [x^2(kh+h) - x^2(kh)] \right) \\
&= \frac{1}{N-1} \sum_{k=0}^{N-1} \frac{\sigma^4(e^{2ah} - 1)}{4a^2} (3(e^{2akh} - 1)^2 + (e^{2akh} - 1)) \\
&\quad - \frac{1}{N-1} \sum_{k=0}^{N-1} \frac{\sigma^4}{2a \ln \gamma} e^{2akh} (e^{2ah} - 1) \\
&= \frac{\sigma^4}{4a^2} \left\{ \frac{7 - 10e^{2aT} + 3e^{4aT} + 8aT}{2T} h + \right. \\
&\quad \left. \frac{7 - 10e^{2aT} + 3e^{4aT} + 3aT + 20aTe^{2aT} - 15ae^{4aT}T + 8a^2T^2}{2T^2} h^2 \right\} \\
&\quad - \frac{\sigma^4}{2a \ln \gamma} \left( \frac{e^{2aT} - 1}{T} h + \frac{e^{2aT} - 1 - 2aTe^{2aT}}{T^2} h^2 \right) + \mathcal{O}(h^3). \\
&\mathbb{E} [\overline{\phi\phi'}] = \sigma^4 \left\{ \frac{1}{(\ln \gamma)^2} + \frac{1 - e^{2aT} + 2aT}{2a^2T \ln \gamma} + \frac{3(3 - 4e^{2aT} + e^{4aT} + 4aT)}{16a^3T} + \frac{1 - e^{2aT} + 2aT}{2a^2T^2 \ln \gamma} h \right\} \\
&\quad + \sigma^4 \frac{9 - 12e^{2aT} + 3e^{4aT} + 8aT + 16aTe^{2aT} - 12aTe^{4aT} + 16a^2T^2}{16a^3T^2} h + \mathcal{O}(h^2).
\end{aligned}$$

We therefore have the result for  $\mathcal{I}_2$  relying on previous computation through coefficients

$$\begin{aligned}
C_{21} &= \frac{\sigma^4(2a + \ln \gamma) (4a - 4ae^{2aT} + 8a^2T + 3 \ln \gamma (3 - 4e^{2aT} + e^{4aT} + 4aT))}{16a^3T \ln \gamma}, \\
C_{22} &= \frac{\sigma^4}{4a^2} \left( \frac{7 - 10e^{2aT} + 3e^{4aT} + 3aT + 20aTe^{2aT} - 15ae^{4aT}T + 8a^2T^2}{2T^2} \right) \\
&\quad - \frac{\sigma^4}{2a \ln \gamma} \left( \frac{e^{2aT} - 1 - 2aTe^{2aT}}{T^2} \right) + \sigma^4 \frac{1 - e^{2aT} + 2aT}{2a^2T^2} \\
&\quad + \sigma^4 \ln \gamma \frac{9 - 12e^{2aT} + 3e^{4aT} + 8aT + 16aTe^{2aT} - 12aTe^{4aT} + 16a^2T^2}{16a^3T^2} \\
&\quad + \sigma^4 \left\{ 1 + \ln \gamma \frac{1 - e^{2aT} + 2aT}{2a^2T} + \frac{3(\ln \gamma)^2 (3 - 4e^{2aT} + e^{4aT} + 4aT)}{16a^3T} \right\} \\
&= -(2a + \ln \gamma)C_{12} + C_{23}.
\end{aligned}$$

For  $\mathcal{I}_3$ , the expectations in Equation 25 can be computed from Lemma A.1. Based on earlier similar computation, we can derive  $\mathcal{I}_3$  as follows:

$$\begin{aligned}
\mathcal{I}_3 &= \frac{h^2 N}{B(N-1)^2} \left[ \sum_{k=0}^{N-2} \sum_{\ell=0}^{N-2} \mathbb{E} \left[ \left( x^2(kh) - \frac{\sigma^2}{\ln \gamma} \right) x^2(kh) \left( x^2(\ell h) - \frac{\sigma^2}{\ln \gamma} \right) x^2(\ell h) \right] \right. \\
&\quad \left. + (M-1) \left( \sum_{k=0}^{N-2} \mathbb{E} \left[ \left( x^2(kh) - \frac{\sigma^2}{\ln \gamma} \right) x^2(kh) \right] \right)^2 \right] \\
&= \frac{C_{31}}{B} h + \left( \frac{C_{320}}{B} + C_{321} \right) h^2 + \mathcal{O}(h^3),
\end{aligned}$$

where

$$C_{31} = \frac{\sigma^8 (5 - e^{4aT} + 4aT - 4e^{2aT} + 8aTe^{2aT})}{8a^4T(\ln \gamma)^2} + \frac{3\sigma^8 (11 + e^{6aT} + 8aT - 9e^{2aT} + 20aTe^{2aT} - 3e^{4aT} - 4aTe^{4aT})}{8a^5T \ln \gamma} + \frac{\sigma^8 (61 + 29e^{6aT} - 3e^{8aT} + 42aT - 18e^{4aT} - 90aTe^{4aT} - 69e^{2aT} + 108aTe^{2aT})}{8a^6T}.$$

and

$$C_{320} = \frac{\sigma^8 (4e^{2aT}(1 - 2aT + 3a^2T^2) + e^{4aT}(3aT - 1) - aT - 5)}{4a^4T^2(\ln \gamma)^2} + \frac{3\sigma^8 (e^{6aT}(9aT - 2) + 2e^{4aT}(3 - 8aT - 12a^2T^2) + e^{2aT}(18 - 37aT + 60a^2T^2) - 4aT - 22)}{8a^5T^2 \ln \gamma} + \frac{\sigma^8 (6e^{8aT}(1 - 6aT) + 29e^{6aT}(-2 + 9aT) + 9e^{4aT}(4 - 7aT - 60a^2T^2))}{8a^6T^2} + \frac{\sigma^8 (3e^{2aT}(46 - 87aT + 108a^2T^2) - 21aT - 122)}{8a^6T^2}.$$

$$C_{321} = \frac{\sigma^8 (1 + 2aT - e^{2aT})^2}{16a^4T^2(\ln \gamma)^2} + \frac{9\sigma^8 (3 - 4e^{2aT} + e^{4aT} + 4aT)^2}{256a^6T^2} + \frac{3\sigma^8 (3 - e^{6aT} + 10aT + 8a^2T^2 + e^{4aT}(5 + 2aT) - e^{2aT}(7 + 12aT))}{32a^5T^2 \ln \gamma} = \frac{\sigma^8 (4a (1 + 2aT - e^{2aT}) + 3 \ln \gamma (3 - 4e^{2aT} + e^{4aT} + 4aT))^2}{256a^6T^2(\ln \gamma)^2}.$$

For  $\mathcal{I}_4$  (Equation 26) and  $\mathcal{I}_5$  (Equation 27), we use the same expansion we exploited for  $\mathcal{I}_2$  to rewrite the form  $\gamma^h \phi(x(kh + h)) - \phi(x(kh))$  as  $[\phi(x(kh + h)) - \phi(x(kh))] + h \ln \gamma \phi(x(kh + h)) + h^2(\ln \gamma)^2 \phi(x(kh + h)) + \mathcal{O}(h^3)$ . Then, both the two terms can be computed similarly to what we did for  $\mathcal{I}_3$ . The leading term of  $h$  in  $\mathcal{I}_5$  will be  $h$  since  $r(kh)$  has a factor  $h$ , e.g.,  $C_{420} = (2a + \ln \gamma)^2 C_{320}$ ,  $C_{520} = -(2a + \ln \gamma) C_{320}$  and

$$C_{421} = \frac{\sigma^8 (2a + \ln \gamma)^2 (4a (1 + 2aT - e^{2aT}) + 3 \ln \gamma (3 - 4e^{2aT} + e^{4aT} + 4aT))^2}{256a^6T^2(\ln \gamma)^2},$$

$$C_{521} = -\frac{\sigma^8 (2a + \ln \gamma) (4a (1 + 2aT - e^{2aT}) + 3 \ln \gamma (3 - 4e^{2aT} + e^{4aT} + 4aT))^2}{256a^6T^2(\ln \gamma)^2}.$$

We then directly obtain  $C_{421} = (2a + \ln \gamma)^2 C_{11}^2$  and  $C_{521} = -(2a + \ln \gamma) C_{11}^2$ .  $\square$

**Corollary A.6** (Sign Structure of Expansion Coefficients). *Let  $a < 0, 0 < \gamma < 1, \sigma > 0, T > 0$ , the coefficients defined in Lemma A.5 satisfy the following sign conditions,*

$$\begin{aligned} C_{11} &< 0, C_{12} > 0, \\ C_{21} &< 0, C_{22} > 0, \\ C_{31} &< 0, C_{320} > 0, C_{321} > 0, \\ C_{41} &< 0, C_{420} > 0, C_{421} > 0, \\ C_{51} &< 0, C_{520} > 0, C_{521} > 0. \end{aligned}$$

*Proof.* We begin with  $C_{11}$ . Recall from Lemma A.5 that

$$C_{11} = -\frac{\sigma^4 (4a - 4ae^{2aT} + 8a^2T + 3 \ln \gamma (3 - 4e^{2aT} + e^{4aT} + 4aT))}{16a^3T \ln \gamma}$$

Since  $a < 0, 0 < \gamma < 1$ , the denominator is positive. In the numerator, the term  $4a - 4ae^{2aT} + 8a^2T = 4a(1 + 2aT - e^{2aT}) > 0$ . Then let's define

$$f(y) = 3 - 4e^{2y} + e^{4y} + 4y, \quad y \leq 0.$$

The derivative with respect  $y$  is:

$$f'(y) = -8e^{2y} + 4e^{4y} + 4 = 4(e^{4y} - 2e^{2y} + 1) = 4(e^{2y} - 1)^2 \geq 0,$$

and the equality holds only when  $e^{2y} = 1$  (i.e.  $y = 0$ ). It follows that  $f'(y) > 0$  for all  $y < 0$ . Thus,  $f$  is strictly increasing on  $(-\infty, 0)$  and  $f(y) < f(0) = 0$ . Substituting  $y = aT$ , we have  $3 - 4e^{2aT} + e^{4aT} + 4aT < 0$ .

Combining these facts shows that the numerator and the denominator of  $C_{11}$  are both positive, hence  $C_{11} < 0$ . Following a similar argument, we can show that  $C_{12} > 0$ .

$C_{31} < 0$  follows from that each term in the summation of  $C_{31}$  is negative, e.g., the nominator of the first term in the summation of  $C_{31}$  is  $5 - e^{4aT} + 4aT - 4e^{2aT} + 8aTe^{2aT}$ , which is strictly negative when  $aT < 0$ . Similarly, one can check the sign of each term in the summations of  $C_{320}$  to show that  $C_{320} > 0$ .  $C_{41} < 0$  and  $C_{51} < 0$  follows immediately from the sign of  $C_{31}$ .

A straightforward term-by-term check yields the sign of the remaining coefficients:  $C_{321} > 0$ ,  $C_{420} > 0$ ,  $C_{421} > 0$ ,  $C_{520} > 0$ ,  $C_{521} > 0$ . This completes the proof.  $\square$

**Now we turn to the proof of our main result, Theorem 4.1.**

*Proof.* We shall show

$$\text{MSE}_t = C_0 + C_1 h + C_2 h^2 + \mathcal{O}(h^3) \quad (58)$$

where  $C_0 \geq 0$ ,  $C_1 \leq 0$ ,  $C_2 \geq 0$  are constants as follows. First, we take  $C_0$  to be the constants with respect to  $h$ , that is

$$C_0 = \frac{\sigma^4}{(\ln \gamma)^2} \left( \theta_0 - \frac{1}{\ln \gamma + 2a} \right)^2.$$

It is trivial that  $C_0 \geq 0$  and  $C_0 = 0$  if and only if when  $\theta_0 = \theta^* = \frac{1}{\ln \gamma + 2a}$ . Furthermore,  $C_0$  is quadratic in terms of  $\theta_0$ .

Then, we collect all the coefficients of  $h$  and obtain

$$\begin{aligned} C_1 &= \frac{2t\alpha\sigma^4 C_{11}}{(\ln \gamma)^2} \left( \theta_0 - \frac{1}{\ln \gamma + 2a} \right) + \frac{2t\alpha\theta_0\sigma^4 C_{21}}{(\ln \gamma)^2} \left( \theta_0 - \frac{1}{\ln \gamma + 2a} \right) \\ &\quad + \frac{t\alpha\sigma^4}{B(\ln \gamma)^2} \left( t\alpha(C_{31} + 2C_{51}\theta_0 + \theta_0^2 C_{41}) + (t-1)\alpha(C_{51} + \theta_0 C_{41}) \left( \theta_0 - \frac{1}{\ln \gamma + 2a} \right) \right). \end{aligned}$$

By applying the analysis in Lemma A.5, we rewrite  $C_1$  as follows.

$$\begin{aligned} C_1 &= \frac{2t\alpha\sigma^8 (2a + \ln \gamma)}{(\ln \gamma)^2} \left( \theta_0 - \frac{1}{\ln \gamma + 2a} \right)^2 \\ &\quad \frac{(4a(1 - e^{2aT} + 2aT) + 3 \ln \gamma (3 - 4e^{2aT} + e^{4aT} + 4aT))}{16a^3 T \ln \gamma} \\ &\quad + \frac{t\alpha\sigma^4}{B(\ln \gamma)^2} \alpha(2t-1) (2a + \ln \gamma)^2 \left( \theta_0 - \frac{1}{\ln \gamma + 2a} \right)^2 C_{31} \\ &= -\frac{2t\alpha\sigma^4 (2a + \ln \gamma)}{(\ln \gamma)^2} \left( \theta_0 - \frac{1}{\ln \gamma + 2a} \right)^2 C_{11} \\ &\quad + \frac{t\alpha\sigma^4}{B(\ln \gamma)^2} \alpha(2t-1) (2a + \ln \gamma)^2 \left( \theta_0 - \frac{1}{\ln \gamma + 2a} \right)^2 C_{31} \\ &= \frac{t\alpha\sigma^4}{(\ln \gamma)^2} \left( \theta_0 - \frac{1}{\ln \gamma + 2a} \right)^2 \left[ -2(2a + \ln \gamma) C_{11} + \frac{\alpha(2t-1) (2a + \ln \gamma)^2 C_{31}}{B} \right] \end{aligned}$$



Since  $C_{11} < 0$  and  $C_{31} < 0$ , we directly have  $C_1 \leq 0$ . Particularly,  $C_1 = 0$  if and only if when  $\theta_0 = \theta^* = \frac{1}{\ln \gamma + 2a}$ .

For  $C_2$ , we compute it similarly to what we did for  $C_1$  as follows.

$$C_2 = \frac{t\alpha\sigma^4}{(\ln \gamma)^2} \left[ 2 \left( \theta_0 - \frac{1}{\ln \gamma + 2a} \right) C_{12} + 2\theta_0 \left( \theta_0 - \frac{1}{\ln \gamma + 2a} \right) C_{22} + t\alpha C_{321} \right. \\ \left. + \alpha\theta_0 \left( \theta_0(2t-1) - \frac{t-1}{\ln \gamma + 2a} \right) C_{421} + \alpha \left( \theta_0(3t-1) - \frac{t-1}{\ln \gamma + 2a} \right) C_{521} \right] \\ + \frac{t\alpha\sigma^4}{B(\ln \gamma)^2} \left\{ t\alpha C_{320} + \alpha\theta_0 \left( \theta_0(2t-1) - \frac{t-1}{\ln \gamma + 2a} \right) C_{420} + \alpha \left( \theta_0(3t-1) - \frac{t-1}{\ln \gamma + 2a} \right) C_{520} \right\}.$$

Hence

$$C_2 = \frac{t\alpha\sigma^4}{(\ln \gamma)^2} \left( \theta_0 - \frac{1}{\ln \gamma + 2a} \right)^2 \\ \left[ 2C_{23} - 2(2a + \ln \gamma)C_{12} + (C_{11}^2 + \frac{C_{320}}{B})(2a + \ln \gamma)^2(t\alpha + (t-1)\alpha) \right],$$

where  $C_{23}, C_{12}, C_{11}, C_{320}$  are given in Lemma A.5. It is straightforward to verify that  $C_2 \geq 0$  since  $C_{23} > 0, C_{12} > 0, C_{11}^2 > 0, C_{320} > 0$ . Furthermore,  $C_2 = 0$  if and only if  $\theta_0 = \theta^* = \frac{1}{\ln \gamma + 2a}$ .  $\square$

For ease of reference, we restate the following quantities.

$$C_{11} = -\frac{\sigma^4 (4a - 4ae^{2aT} + 8a^2T + 3 \ln \gamma (3 - 4e^{2aT} + e^{4aT} + 4aT))}{16a^3T \ln \gamma}, \\ C_{12} = -\frac{\sigma^4 (1 - e^{2aT} - aT + 3aTe^{2aT})}{4a^2T^2 \ln \gamma} \\ - \frac{3\sigma^4 (3 - 4e^{2aT} + e^{4aT} - 2aT + 12aTe^{2aT} - 6aTe^{4aT})}{16a^3T^2}, \\ C_{23} = \frac{3\sigma^4 (2a + \ln \gamma)^2 (3 - 4e^{2aT} + e^{4aT} + 4aT)}{32a^3T}, \\ C_{31} = \frac{\sigma^8 (5 - e^{4aT} + 4aT - 4e^{2aT} + 8aTe^{2aT})}{8a^4T(\ln \gamma)^2} \\ + \frac{3\sigma^8 (11 + e^{6aT} + 8aT - 9e^{2aT} + 20aTe^{2aT} - 3e^{4aT} - 4aTe^{4aT})}{8a^5T \ln \gamma} \\ + \frac{\sigma^8 (61 + 29e^{6aT} - 3e^{8aT} + 42aT - 18e^{4aT} - 90aTe^{4aT} - 69e^{2aT} + 108aTe^{2aT})}{8a^6T}, \\ C_{320} = \frac{\sigma^8 (4e^{2aT}(1 - 2aT + 3a^2T^2) + e^{4aT}(3aT - 1) - aT - 5)}{4a^4T^2(\ln \gamma)^2} \\ + \frac{3\sigma^8 (e^{6aT}(9aT - 2) + 2e^{4aT}(3 - 8aT - 12a^2T^2) + e^{2aT}(18 - 37aT + 60a^2T^2) - 4aT - 22)}{8a^5T^2 \ln \gamma} \\ + \frac{\sigma^8 (6e^{8aT}(1 - 6aT) + 29e^{6aT}(-2 + 9aT) + 9e^{4aT}(4 - 7aT - 60a^2T^2))}{8a^6T^2} \\ + \frac{\sigma^8 (3e^{2aT}(46 - 87aT + 108a^2T^2) - 21aT - 122)}{8a^6T^2}$$

## A.3 PROOF OF COROLLARY 4.2 AND COROLLARY 4.3

*Proof of Corollary 4.2.* Based on Theorem 4.1, we can further find  $h^*$  as follows.

$$h^* = \arg \min_h \text{MSE}_t$$

$$= -\frac{-2(2a + \ln \gamma) C_{11} + \frac{\alpha(2t-1)(2a+\ln \gamma)^2 C_{31}}{B}}{2[2C_{23} - 2(2a + \ln \gamma)C_{12} + (C_{11}^2 + \frac{C_{320}}{B})(2a + \ln \gamma)^2(2t-1)\alpha]},$$

which is not affected by the initial value  $\theta_0$ . The corresponding minimal t-step MSE follows by substituting  $h = h^*$ ,

$$\text{MSE}_t^* \approx \frac{\sigma^4 \left( \theta_0 - \frac{1}{\ln \gamma + 2a} \right)^2}{(\ln \gamma)^2} \left[ 1 - \frac{4ta\alpha \left( -2(2a + \ln \gamma) C_{11} + \frac{\alpha(2t-1)(2a+\ln \gamma)^2 C_{31}}{B} \right)^2}{2C_{23} - 2(2a + \ln \gamma)C_{12} + (C_{11}^2 + \frac{C_{320}}{B})(2a + \ln \gamma)^2(2t-1)\alpha} \right]. \quad (59)$$

□

*Proof of Corollary 4.3.* Let's rewrite the t-step MSE  $\text{MSE}_t$  as follows:

$$\text{MSE}_t = \left\{ 1 + t\alpha \left[ -2(2a + \ln \gamma) (C_{11}h + C_{12}h^2) + 2C_{23}h^2 + C_{11}^2h^2(2a + \ln \gamma)^2(2t-1)\alpha \right] \right. \\ \left. + \frac{t(2t-1)\alpha^2(2a + \ln \gamma)^2(C_{31}h + C_{320}h^2)}{B} \right\} \frac{\sigma^4}{(\ln \gamma)^2} \left( \theta_0 - \frac{1}{\ln \gamma + 2a} \right)^2 + \mathcal{O}(h^3).$$

If the budget  $B$  is large, the approximation becomes

$$\text{MSE}_t = \left\{ 1 + t\alpha \left[ -2(2a + \ln \gamma) (C_{11}h + C_{12}h^2) + 2C_{23}h^2 + C_{11}^2h^2(2a + \ln \gamma)^2(2t-1)\alpha \right] \right\} \\ \frac{\sigma^4}{(\ln \gamma)^2} \left( \theta_0 - \frac{1}{\ln \gamma + 2a} \right)^2 + \mathcal{O}\left(\frac{1}{B}\right) + \mathcal{O}(h^3).$$

Therefore, we obtain the optimal  $h$  from the above approximation.

$$h^* \approx -\frac{-2(2a + \ln \gamma) C_{11}}{2[2C_{23} - 2(2a + \ln \gamma)C_{12} + C_{11}^2(2a + \ln \gamma)^2(2t-1)\alpha]}.$$

If the horizon  $T$  is large (therefore,  $B$  is large), we have

$$\begin{aligned} C_{11} &\rightarrow -\frac{\sigma^4(2a + 3\ln \gamma)}{4a^2 \ln \gamma}, \\ C_{23} &\rightarrow \frac{3\sigma^4(2a + \ln \gamma)^2}{8a^2}, \\ C_{12} &\rightarrow 0 \\ C_{31}/B &\rightarrow 0, \\ C_{320} &\rightarrow 0. \end{aligned}$$

The MSE becomes

$$\text{MSE}_t = \frac{\sigma^4}{(\ln \gamma)^2} \left( \theta_0 - \frac{1}{\ln \gamma + 2a} \right)^2 \left\{ 1 + t\alpha \left[ \frac{\sigma^4(2a + \ln \gamma)(2a + 3\ln \gamma)}{2a^2 \ln \gamma} h \right. \right. \\ \left. \left. + (2a + \ln \gamma)^2 \left( \frac{3\sigma^4}{4a^2} + \frac{\sigma^8(2a + 3\ln \gamma)^2(2t-1)\alpha}{16a^4(\ln \gamma)^2} \right) h^2 \right] \right\} + \mathcal{O}\left(\frac{1}{T}\right) + \mathcal{O}(h^3).$$

In this case, we can obtain the optimal  $h$  as

$$h^* = -\frac{8a^2 \ln \gamma (2a + 3\ln \gamma)}{(2a + \ln \gamma) (12a^2(\ln \gamma)^2 + \sigma^4(2a + 3\ln \gamma)^2(2t-1)\alpha)}.$$

□

#### A.4 CONVERGENCE ANALYSIS OF TD(0) IN SCALAR SETTING

##### A.4.1 CONVERGENCE OF OFFLINE MEAN-PATH TD(0)

In Section 5.1, we presented empirical evidence that  $\theta_t$  converges to the LSTD estimate  $\theta_{\text{LSTD}}$ . The following proposition formalizes this observation and establishes the conditions under which such convergence is guaranteed.

**Proposition A.7** (Convergence of offline mean-path TD(0)). *Under the following assumptions*

A1.  $\left(\overline{\phi(\gamma^h \phi' - \phi)}\right)$  is nonzero.

A2.  $\left|1 + \alpha \left(\overline{\phi(\gamma^h \phi' - \phi)}\right)\right| < 1$ .

we have

(i)  $\theta_{\text{LSTD}} = -\left(\overline{\phi(\gamma^h \phi' - \phi)}\right)^{-1} \overline{\phi r}$  is the unique fixed point of the mean-path TD iteration in equation 3.

(ii) For any initial  $\theta_0$ , we have  $\lim_{t \rightarrow \infty} \theta_t = \theta_{\text{LSTD}}$ . That is, the offline mean-path TD(0) converges to the LSTD estimate given a dataset.

*Proof.* By equation 3, the fixed point satisfies  $\bar{\theta} = \bar{\theta} + \alpha \left(\overline{\phi r} + \left(\overline{\phi(\gamma^h \phi' - \phi)}\right) \bar{\theta}\right)$ . By assumption A1,  $\left(\overline{\phi(\gamma^h \phi' - \phi)}\right)$  is invertible, we have the unique solution  $\bar{\theta} = -\left(\overline{\phi(\gamma^h \phi' - \phi)}\right)^{-1} \overline{\phi r}$ . It matches the definition of LSTD estimate  $\theta_{\text{LSTD}}$ , hence it is the unique fixed point of the mean-path TD(0) recursion. This completes the proof of (i).

Define the estimation error at iteration  $t$  as  $e_t := \theta_t - \theta_{\text{LSTD}}$ . Then, by equation 3, we have the update rule of the estimation error as follows.

$$\begin{aligned} e_{t+1} &= \theta_{t+1} - \theta_{\text{LSTD}} \\ &= \theta_t + \alpha \left(\overline{\phi r} + \left(\overline{\phi(\gamma^h \phi' - \phi)}\right) \theta_t\right) - \theta_{\text{LSTD}} \\ &= e_t + \alpha \left(\overline{\phi r} + \left(\overline{\phi(\gamma^h \phi' - \phi)}\right) (e_t + \theta_{\text{LSTD}})\right) \\ &= e_t \left(1 + \alpha \left(\overline{\phi(\gamma^h \phi' - \phi)}\right)\right) + \underbrace{\alpha \left(\overline{\phi r} + \left(\overline{\phi(\gamma^h \phi' - \phi)}\right) \theta_{\text{LSTD}}\right)}_{=0 \text{ by result (i)}} \\ &= e_t \left(1 + \alpha \left(\overline{\phi(\gamma^h \phi' - \phi)}\right)\right). \end{aligned}$$

By recursively applying the above relation, we have

$$e_t = \left(1 + \alpha \left(\overline{\phi(\gamma^h \phi' - \phi)}\right)\right)^t e_0 \quad \text{for any } t.$$

By Assumption A2, we have  $\lim_{t \rightarrow \infty} \left(1 + \alpha \left(\overline{\phi(\gamma^h \phi' - \phi)}\right)\right)^t = 0$ . Therefore,  $\lim_{t \rightarrow \infty} e_t = 0$ , which implies result (ii).  $\square$

Proposition A.7 establishes the convergence of the offline mean-path TD(0) to the LSTD solution given an offline finite sample. The assumptions are mild. A1 ensures that the LSTD solution is well-defined. A2 imposes a learning rate constraint  $0 < \alpha < 2 \left(-\overline{\phi(\gamma^h \phi' - \phi)}\right)^{-1}$  and implies that the empirical term  $\overline{\phi(\gamma^h \phi' - \phi)}$  must be negative to ensure stability. Under this condition, convergence is guaranteed.

#### A.4.2 FINITE SAMPLE ANALYSIS OF MEAN-PATH TD

We now give the finite sample analysis of the mean-path TD in the population sense, as defined in Bhandari et al. (2018), distinct from the offline formulation. The mean-path TD driven by the expected semi-gradient converges to the population LSTD solution, which is the TD fixed point  $\theta_{TD}$ . A key technical challenge in the Ornstein-Uhlenbeck (OU) setting is that the features are not uniformly bounded, violating the standard assumption used in Bhandari et al. (2018). In this section, we relax this assumption and establish that convergence holds even under the unbounded support of the OU process. We begin by establishing the preliminary definitions and notation.

Let  $(X, X')$  denote a stationary pair generated by the process defined in equation 1. Specifically,  $X \sim \pi$  and  $X'|X \sim P_h(\cdot|X)$ , where  $\pi$  is the stationary distribution of the OU process and  $P_h$  is the transition kernel over time interval  $h$ .

We then define the  $\pi$ -norm by

$$\langle f, g \rangle_\pi := \mathbb{E}_{X \sim \pi}[f(X)g(X)], \quad \|f\|_\pi^2 := \langle f, f \rangle_\pi,$$

for any measurable functions  $f, g$ . Then, the  $\pi$ -norm for the value is

$$\|V_\theta\|_\pi^2 := \mathbb{E}_\pi[V_\theta^2] = \theta^2 \mathbb{E}_\pi[\phi(X)^2]. \quad (60)$$

Therefore,  $\|V(X)\|_\pi^2 = \mathbb{E}_\pi[V(X)^2]$ . Corresponding to the offline mean-path semi-gradient (equation 4), we have the population level mean negative semi-gradient as

$$\bar{g}_h(\theta) = \mathbb{E}[\phi(X)r(X) + \phi(X)(\gamma^h V_\theta(X') - V_\theta(X))], \quad (61)$$

where the expectation is taking with respect to the stationary joint law of  $(X, X')$ .

The mean-path TD update is  $\theta_{t+1} = \theta_t + \alpha \bar{g}_h(\theta)$  and the TD fixed point  $\theta_{TD}$  satisfies  $\bar{g}_h(\theta_{TD}) = 0$ . The following lemma establishes the monotonicity of the expected negative semi-gradient.

**Lemma A.8.** *For any  $\theta$ ,*

$$(\theta_{TD} - \theta) \bar{g}_h(\theta) \geq (1 - \gamma^h) \|V_\theta - V_{\theta_{TD}}\|_\pi^2$$

This lemma follows directly from Lemma 3 in Bhandari et al. (2018).

The stationary distribution of the OU process defined in Equation 1 is known to be a normal distribution  $\mathcal{N}(0, \frac{\sigma^2}{-2a})$ . We compute the second moment of the feature under this stationary distribution, denoted as:

$$\mathcal{C} := \mathbb{E}_\pi[\phi(X)^2] = \sigma^4 \left( \frac{3}{4a^2} + \frac{1}{a \ln \gamma} + \frac{1}{(\ln \gamma)^2} \right)$$

We are now ready to state the main convergence result, which will be characterized by a finite sample bound with explicit rate.

**Proposition A.9** (Convergence of mean-path TD(0)). *Let the averaged iterate  $\bar{\theta}_t = \frac{1}{t} \sum_{\ell=0}^{t-1} \theta_\ell$ . Assume that  $\alpha \in \left(0, \frac{1-\gamma^h}{(1+\gamma^h)^2 \mathcal{C}}\right]$ . Then,*

$$\|V_{\bar{\theta}_t} - V_{\theta_{TD}}\|_\pi^2 \leq \frac{(1 + \gamma^h)^2 \mathcal{C} \|\theta_0 - \theta_{TD}\|_2^2}{t(1 - \gamma^h)^2}. \quad (62)$$

For each  $t \in \mathbb{N}$ , we have

$$\|V_{\theta_t} - V_{\theta_{TD}}\|_\pi^2 \leq \exp \left\{ -\frac{t(1 - \gamma^h)^2}{(1 + \gamma^h)^2} \right\} \|V_{\theta_0} - V_{\theta_{TD}}\|_\pi^2, \quad (63)$$

$$\|\theta_t - \theta_{TD}\|_2^2 \leq \exp \left\{ -\frac{t(1 - \gamma^h)^2}{(1 + \gamma^h)^2} \right\} \|\theta_0 - \theta_{TD}\|_2^2. \quad (64)$$

In particular,  $\lim_{t \rightarrow \infty} \theta_t = \theta_{TD}$  and  $\lim_{t \rightarrow \infty} V_{\theta_t} = V_{\theta_{TD}}$  in the  $\pi$ -norm.

*Proof.* For any  $\theta$ , we denote the value function error as

$$\eta_0 := V_{\theta_{\text{TD}}}(X) - V_{\theta}(X), \quad \eta_1 := V_{\theta_{\text{TD}}}(X') - V_{\theta}(X').$$

Recall that

$$\begin{aligned} \bar{g}_h(\theta) &= \mathbb{E} [\phi(X)r(X) + \phi(X) (\gamma^h V_{\theta}(X') - V_{\theta}(X))] \\ &= \mathbb{E} [\phi(X) \{r(X) + \gamma^h V_{\theta}(X') - V_{\theta}(X)\}] \\ &= \mathbb{E} [\phi(X) \{r(X) + \gamma^h V_{\theta_{\text{TD}}}(X') - V_{\theta_{\text{TD}}}(X)\}] \\ &\quad + \mathbb{E} [\phi(X) \{\gamma^h [V_{\theta}(X') - V_{\theta_{\text{TD}}}(X')] - [V_{\theta}(X) - V_{\theta_{\text{TD}}}(X)]\}]. \end{aligned}$$

By the fact that  $\bar{g}_h(\theta_{\text{TD}}) = 0$  has the unique solution  $\theta_{\text{TD}}$ , we have

$$0 = \bar{g}_h(\theta_{\text{TD}}) = \mathbb{E} [\phi(X) \{r(X) + \gamma^h V_{\theta_{\text{TD}}}(X') - V_{\theta_{\text{TD}}}(X)\}].$$

Therefore,

$$\begin{aligned} \bar{g}_h(\theta) &= \mathbb{E} [\phi(X) \{\gamma^h [V_{\theta}(X') - V_{\theta_{\text{TD}}}(X')] - [V_{\theta}(X) - V_{\theta_{\text{TD}}}(X)]\}] \\ &= \mathbb{E} [\phi(X)(\eta_0 - \gamma^h \eta_1)]. \end{aligned}$$

Applying Cauchy-Schwarz inequality, we have

$$\begin{aligned} \|\bar{g}_h(\theta)\|_2^2 &= \|\mathbb{E} [\phi(X)(\eta_0 - \gamma^h \eta_1)]\|_2^2 \\ &\leq \mathbb{E} [\phi(X)^2] \mathbb{E} [(\eta_0 - \gamma^h \eta_1)^2] \\ &= \mathcal{C} \mathbb{E} [(\eta_0 - \gamma^h \eta_1)^2]. \end{aligned} \tag{65}$$

Since  $\gamma^h \in (0, 1)$  and  $\eta_0, \eta_1$  have the same distribution, we have  $\mathbb{E}[\eta_0^2] = \mathbb{E}[\eta_1^2] = \|V_{\theta} - V_{\theta_{\text{TD}}}\|_{\pi}^2$ . Also,  $|\mathbb{E}[\eta_0 \eta_1]| \leq 1/2 \mathbb{E}[\eta_0^2 + \eta_1^2] = \|V_{\theta} - V_{\theta_{\text{TD}}}\|_{\pi}^2$ .

We have

$$\begin{aligned} \mathbb{E} [(\eta_0 - \gamma^h \eta_1)^2] &\leq (\gamma^{2h} + 1) \|V_{\theta} - V_{\theta_{\text{TD}}}\|_{\pi}^2 + 2\gamma^h \|V_{\theta} - V_{\theta_{\text{TD}}}\|_{\pi}^2 \\ &= (1 + \gamma^h)^2 \|V_{\theta} - V_{\theta_{\text{TD}}}\|_{\pi}^2. \end{aligned}$$

Combining this with equation 65, we have

$$\|\bar{g}_h(\theta)\|_2^2 \leq (1 + \gamma^h)^2 \mathcal{C} \|V_{\theta} - V_{\theta_{\text{TD}}}\|_{\pi}^2. \tag{66}$$

Now, let the estimation error  $e_{\ell} := \theta_{\ell} - \theta_{\text{TD}}$ . We have the update

$$e_{\ell+1} = \theta_{\ell+1} - \theta_{\text{TD}} = e_{\ell} + \alpha \bar{g}_h(\theta_{\ell}),$$

and therefore,

$$e_{\ell+1}^2 = e_{\ell}^2 + 2\alpha e_{\ell} \bar{g}_h(\theta_{\ell}) + \alpha^2 \bar{g}_h(\theta_{\ell})^2. \tag{67}$$

By Lemma A.8,  $(\theta_{\text{TD}} - \theta_{\ell}) \bar{g}_h(\theta_{\ell}) \geq (1 - \gamma^h) \|V_{\theta_{\ell}} - V_{\theta_{\text{TD}}}\|_{\pi}^2$ , which can be written as

$$e_{\ell} \bar{g}_h(\theta_{\ell}) \leq -(1 - \gamma^h) \|V_{\theta_{\ell}} - V_{\theta_{\text{TD}}}\|_{\pi}^2.$$

Now, apply the above inequality and  $\|\bar{g}_h(\theta)\|_2^2 \leq (1 + \gamma^h)^2 \mathcal{C} \|V_{\theta} - V_{\theta_{\text{TD}}}\|_{\pi}^2$  to equation 67, we have

$$\begin{aligned} e_{\ell+1}^2 &\leq e_{\ell}^2 - 2\alpha(1 - \gamma^h) \|V_{\theta_{\ell}} - V_{\theta_{\text{TD}}}\|_{\pi}^2 + \alpha^2(1 + \gamma^h)^2 \mathcal{C} \|V_{\theta_{\ell}} - V_{\theta_{\text{TD}}}\|_{\pi}^2 \\ &= e_{\ell}^2 - (2\alpha(1 - \gamma^h) - (1 + \gamma^h)^2 \alpha^2 \mathcal{C}) \|V_{\theta_{\ell}} - V_{\theta_{\text{TD}}}\|_{\pi}^2. \end{aligned} \tag{68}$$

Now, by the assumption that  $\alpha \in \left(0, \frac{1 - \gamma^h}{(1 + \gamma^h)^2 \mathcal{C}}\right]$ , we have  $2\alpha(1 - \gamma^h) - (1 + \gamma^h)^2 \alpha^2 \mathcal{C} \geq \alpha(1 - \gamma^h)$ .

We can take  $\alpha = \frac{1 - \gamma^h}{(1 + \gamma^h)^2 \mathcal{C}}$  (smaller values hold in the same way with a smaller bound), then equation 68 becomes

$$e_{\ell+1}^2 \leq e_{\ell}^2 - \frac{(1 - \gamma^h)^2}{(1 + \gamma^h)^2 \mathcal{C}} \|V_{\theta_{\ell}} - V_{\theta_{\text{TD}}}\|_{\pi}^2. \tag{69}$$



Rearranging the terms and summing over  $\ell$  yields a telescoping series:

$$\frac{(1 - \gamma^h)^2}{(1 + \gamma^h)^2 \mathcal{C}} \sum_{\ell=0}^{t-1} \|V_{\theta_\ell} - V_{\theta_{\text{TD}}}\|_\pi^2 \leq e_0^2 - e_t^2 \leq e_0^2 \quad (70)$$

Therefore,

$$\frac{1}{t} \sum_{\ell=0}^{t-1} \|V_{\theta_\ell} - V_{\theta_{\text{TD}}}\|_\pi^2 \leq \frac{(1 + \gamma^h)^2 \mathcal{C} e_0^2}{t(1 - \gamma^h)^2} = \frac{(1 + \gamma^h)^2 \mathcal{C} \|\theta_0 - \theta_{\text{TD}}\|_2^2}{t(1 - \gamma^h)^2}. \quad (71)$$

Then, we have

$$\begin{aligned} \|V_{\theta_t} - V_{\theta_{\text{TD}}}\|_\pi^2 &= \left\| \frac{1}{t} \sum_{\ell=0}^{t-1} (V_{\theta_\ell} - V_{\theta_{\text{TD}}}) \right\|_\pi^2 \\ &\leq \frac{1}{t} \sum_{\ell=0}^{t-1} \|V_{\theta_\ell} - V_{\theta_{\text{TD}}}\|_\pi^2 \\ &\leq \frac{(1 + \gamma^h)^2 \mathcal{C} \|\theta_0 - \theta_{\text{TD}}\|_2^2}{t(1 - \gamma^h)^2}. \end{aligned}$$

This proves equation 62.

To prove the other two results, we rewrite equation 69 by

$$\begin{aligned} e_{\ell+1}^2 &\leq e_\ell^2 - \frac{(1 - \gamma^h)^2}{(1 + \gamma^h)^2 \mathcal{C}} \|V_{\theta_\ell} - V_{\theta_{\text{TD}}}\|_\pi^2 \\ &= e_\ell^2 - \frac{(1 - \gamma^h)^2}{(1 + \gamma^h)^2 \mathcal{C}} \mathcal{C} e_\ell^2 \quad (\text{by equation 60}) \end{aligned} \quad (72)$$

$$= \left(1 - \frac{(1 - \gamma^h)^2}{(1 + \gamma^h)^2}\right) e_\ell^2. \quad (73)$$

The above recursive form implies

$$e_t^2 \leq \left(1 - \frac{(1 - \gamma^h)^2}{(1 + \gamma^h)^2}\right)^t e_0^2.$$

Therefore,

$$\|V_{\theta_t} - V_{\theta_{\text{TD}}}\|_\pi^2 = \mathcal{C} e_t^2 \leq \left(1 - \frac{(1 - \gamma^h)^2}{(1 + \gamma^h)^2}\right)^t e_0^2 \mathcal{C} = \left(1 - \frac{(1 - \gamma^h)^2}{(1 + \gamma^h)^2}\right)^t \|V_{\theta_0} - V_{\theta_{\text{TD}}}\|_\pi^2.$$

By the fact that  $1 - b \leq e^{-b}$  for  $b > 0$ , we rewrite the above result as

$$\|V_{\theta_t} - V_{\theta_{\text{TD}}}\|_\pi^2 \leq \exp\left\{-\frac{t(1 - \gamma^h)^2}{(1 + \gamma^h)^2}\right\} \|V_{\theta_0} - V_{\theta_{\text{TD}}}\|_\pi^2,$$

which is equation 63. By the fact that  $\|V_{\theta_t} - V_{\theta_{\text{TD}}}\|_\pi^2 = \mathcal{C} \|\theta_t - \theta_{\text{TD}}\|_2^2$ , we further have

$$\|\theta_t - \theta_{\text{TD}}\|_2^2 \leq \exp\left\{-\frac{t(1 - \gamma^h)^2}{(1 + \gamma^h)^2}\right\} \|\theta_0 - \theta_{\text{TD}}\|_2^2$$

When  $t \rightarrow \infty$ , the convergences of  $\theta_t$  and  $V_{\theta_t}$  follows directly.  $\square$

**Remark A.10.** Proposition A.9 relaxes the assumption of normalized features required in Theorem 1 of Bhandari et al. (2018). In a general setting, our result holds as long as the stationary distribution  $\pi$  has a finite 4-th moment, which includes the OU process as a particular case.

#### A.5 EXTENDING THE CONVERGENCE ANALYSIS FROM SCALAR TO VECTOR SETTING

To emphasize that the main results are generalizable, we further extend the main results to a  $d$ -dimensional setting, where  $d \in \mathbb{N}^+$ .

Assuming the dynamics and reward are defined in  $d$ -dimensional, i.e.,

$$d\mathbf{X}(t) = A\mathbf{X}(t)dt + \sigma d\mathbf{W}(t), \quad \mathbf{X}(t) \in \mathbb{R}^d, \quad (74)$$

where

- $A \in \mathbb{R}^{d \times d}$  is a Hurwitz matrix such that all eigenvalues have strictly negative real part.
- $\sigma > 0$  is scalar.
- $\mathbf{W}(t)$  is a  $d$ -dimensional standard Brownian motion.

We sample at times  $t = kh$ ,  $\mathbf{X}(kh)$ , giving a discrete time Markov chain

$$\mathbf{X}((k+1)h) = e^{Ah}\mathbf{X}(kh) + \mathbf{Z}(h), \quad \mathbf{Z}(h) \sim N(0, \Sigma_h), \quad (75)$$

where  $\Sigma_h = \sigma^2 \int_0^h e^{A(h-s)} e^{A^\top(h-s)} ds$ .

In this setting, we set the value and feature as follows.

Let  $\phi : \mathbb{R}^d \rightarrow \mathbb{R}^p$  be a feature map and consider a linear function approximation of the value function parametrized by  $\theta \in \mathbb{R}^p$  by  $V_\theta(\mathbf{x}) = \phi(\mathbf{x})^\top \theta$ . The quadratic reward is  $r(\mathbf{x}) = -\mathbf{x}^\top Q \mathbf{x}$ , where  $Q \in \mathbb{R}^{d \times d}$  is some positive definite, symmetric matrix. Then, the value is

$$V(\mathbf{x}(\tau)) = -\mathbb{E} \left[ \int_\tau^t \gamma^{t-\tau} \mathbf{x}(t)^\top Q \mathbf{x}(t) dt \right]. \quad (76)$$

We prove mean-path TD converges to LSTD estimate both in empirical sense and in population sense.

First, we consider the empirical mean-path TD with an offline dataset of  $M$  trajectories, each of length  $N$ . Let  $\Phi \in \mathbb{R}^{B \times p}$  with rows are  $\phi(\mathbf{X}_i(kh))^\top$ ,  $\Phi' \in \mathbb{R}^{B \times p}$  with rows are  $\phi(\mathbf{X}_i((k+1)h))^\top$ , and  $\mathbf{r} \in \mathbb{R}^B$  with entries are  $r(\mathbf{X}_i(kh))$ . The gradient update becomes

$$\bar{G}(\theta) = \frac{1}{B} (\Phi^\top \mathbf{r} + \Phi^\top (\gamma^h \Phi' - \Phi) \theta). \quad (77)$$

The mean-path TD recursion is  $\theta_{t+1} = \theta_t + \alpha \bar{G}(\theta)$ . The empirical LSTD estimate  $\theta_{\text{LSTD}}$  is the solution of  $\bar{G}(\theta) = 0$ .

**Corollary A.11** (Empirical mean-path TD converges to empirical LSTD estimate in vector case).  
Assuming that

B1  $\Phi^\top (\gamma^h \Phi' - \Phi)$  is nonsingular.

B2 The spectral radius of  $I_p + \alpha (\Phi^\top (\gamma^h \Phi' - \Phi)) < 1$ .

Then, we have

(i) The empirical LSTD solution  $\theta_{\text{LSTD}} = -(\Phi^\top (\gamma^h \Phi' - \Phi))^{-1} \Phi^\top \mathbf{r}$  is the unique fixed point of the empirical mean-path TD.

(ii) For any initial value  $\theta_0$ , we have  $\lim_{t \rightarrow \infty} \theta_t \rightarrow \theta_{\text{LSTD}}$ .

The proof follows exactly the proof of Proposition A.7.

For the convergence of the online version of the population mean-path TD(0), we will show the mean-path TD using the expected semi-gradient converges to the population LSTD solution. We use the following setting and notations.

Denote the stationary law is  $\pi$ , i.e., if the Markov chain converges, a sample  $\mathbf{X} \sim \pi$ , then  $\mathbf{X}' \sim \pi$  for time interval  $h$  between  $\mathbf{X}, \mathbf{X}'$ .

Assuming that

C1 There is a unique  $\theta^*$  such that  $V(\mathbf{x}) = \phi(\mathbf{x})^\top \theta^*$  for any  $\mathbf{x}$ .

C2  $\mathcal{C} := \mathbb{E}_\pi[\|\phi(\mathbf{X})\|_2^2] < \infty$  and  $\Sigma_\phi = \mathbb{E}[\phi(\mathbf{X})\phi(\mathbf{X})^\top]$  is positive definite.

It is trivial to check Assumption C2 holds for various choices of  $\phi$ . For example, if  $\phi(\mathbf{x}) = (x_1^2 - \frac{\sigma^2}{\ln \gamma}, \dots, x_d^2 - \frac{\sigma^2}{\ln \gamma})^\top$ ,  $\mathcal{C} := \mathbb{E}_\pi[\|\phi(\mathbf{X})\|_2^2] = \sum_{j=1}^d \mathbb{E}[(X_j^2 - \frac{\sigma^2}{\ln \gamma})^2] < \infty$ , since each coordinate  $X_j$  is normal distributed.

To prove  $\Sigma_\phi = \mathbb{E}[\phi(\mathbf{X})\phi(\mathbf{X})^\top]$  is positive definite, it is sufficient to show  $b^\top \phi(\mathbf{X})$  is not almost surely constant if  $b \neq 0$ . If the quadratic polynomial (in  $\mathbf{X}$ )  $b^\top \phi(\mathbf{X})$  is constant almost surely, the gradient with the  $j$ -coordinate is  $\frac{\partial}{\partial X_j} b^\top \phi(\mathbf{X}) = 2b_j X_j$ . We must have  $2b_j X_j = 0$  for all  $\mathbf{X}$ , which means  $b_j = 0$  for any  $j$ . Thus,  $b = 0$ , which is a contradiction.

If  $\phi(\mathbf{x}) = \text{svec}(\mathbf{x}\mathbf{x}^\top - \frac{\sigma^2}{\ln \gamma} I_d)$ , as in the setting of Tu & Recht (2018) where  $\text{svec}()$  is a symmetric vectorization operator, we denote  $\phi(\mathbf{x}) = (Z_1, \dots, Z_p)^\top$ , where the components are either the diagonal terms or the off-diagonal terms of  $(\mathbf{x}\mathbf{x}^\top - \frac{\sigma^2}{\ln \gamma} I_d)$ . The diagonal term has the form  $x_i^2 - \frac{\sigma^2}{\ln \gamma}$ , and the off-diagonal term has the form  $\sqrt{2}x_i x_j$ ,  $i \neq j$ , both are quadratic polynomials in normal random variables. Then,  $\mathbb{E}[\|\phi(\mathbf{X})\|_2^2] = \sum_{j=1}^p \mathbb{E}[Z_j^2] < \infty$ . The covariance  $\Sigma_\phi$  is also positive definite, since any nontrivial linear combination  $b^\top \phi(\mathbf{X})$  is a nonconstant quadratic form in  $\mathbf{X}$ , thus has positive variance.

In a general form of  $\phi$ , we should keep Assumption C2 holds for have the following convergence result.

We define the  $\pi$ -norm on value functions as in the scalar case by

$$\begin{aligned} \|V\|_\pi^2 &:= \mathbb{E}_\pi[V(\mathbf{X})] \\ \|V_\theta - V_{\theta'}\|_\pi^2 &= (\theta - \theta')^\top \Sigma_\phi (\theta - \theta'). \end{aligned}$$

The population mean semi-gradient TD update is

$$\bar{G}_h(\theta) = \mathbb{E}[\phi(\mathbf{X}) (r(\mathbf{X}) + \gamma^h V_\theta(\mathbf{X}') - V_\theta(\mathbf{X}))]. \quad (78)$$

The LSTD solution  $\theta_{\text{TD}}$  is the solution of the projected Bellman fixed point defined by  $\bar{G}_h(\theta_{\text{TD}}) = 0$ .

We extend the finite sample bound for the scalar case in Proposition A.9 to the vector case as follows. It turns out that the finite sample bound for the vector case admits a similar form to that of the scalar case.

**Proposition A.12** (Convergence of mean-path TD(0), vector case). *Let the averaged iterate  $\bar{\theta}_t = \frac{1}{t} \sum_{\ell=0}^{t-1} \theta_\ell$ . Assume that  $\alpha \in \left(0, \frac{(1-\gamma^h)}{\mathcal{C}^2(1+\gamma^h)^2}\right]$ . Then,*

$$\|V_{\bar{\theta}_t} - V_{\theta_{\text{TD}}}\|_\pi^2 \leq \frac{(1+\gamma^h)^2 \mathcal{C} \|\theta_0 - \theta_{\text{TD}}\|_2^2}{t(1-\gamma^h)^2}. \quad (79)$$

For each  $t \in \mathbb{N}$ , we have

$$\|V_{\theta_t} - V_{\theta_{\text{TD}}}\|_\pi^2 \leq \exp \left\{ -\frac{t(1-\gamma^h)^2}{(1+\gamma^h)^2} \right\} \|V_{\theta_0} - V_{\theta_{\text{TD}}}\|_\pi^2, \quad (80)$$

$$\|\theta_t - \theta_{\text{TD}}\|_2^2 \leq \kappa \exp \left\{ -\frac{t(1-\gamma^h)^2}{(1+\gamma^h)^2} \right\} \|\theta_0 - \theta_{\text{TD}}\|_2^2, \quad (81)$$

where  $\kappa$  only depends on the minimal and maximal eigenvalues of  $\Sigma_\phi$ .

In particular,  $\lim_{t \rightarrow \infty} \theta_t = \theta_{\text{TD}}$  and  $\lim_{t \rightarrow \infty} V_{\theta_t} = V_{\theta_{\text{TD}}}$  in the  $D$ -norm.

*Proof.* The proof follows the same idea as that in the proof of Proposition A.9. It is sufficient to show the following two inequalities.

(i) Lemma A.8 in d-dimension case holds in the same way. That is, for any  $\theta$ ,

$$(\theta_{\text{TD}} - \theta) \bar{G}_h(\theta) \geq (1-\gamma^h) \|V_\theta - V_{\theta_{\text{TD}}}\|_\pi^2. \quad (82)$$

(ii) Moreover, the inequality equation 66 in d-dimension case holds in the same way. That is, for any  $\theta$ ,

$$\|\bar{G}_h(\theta)\|_2^2 \leq (1 + \gamma^h)^2 \mathcal{C} \|V_\theta - V_{\theta_{\text{TD}}}\|_\pi^2. \quad (83)$$

Now, denote  $\xi_\ell := \|V_{\theta_\ell} - V_{\theta_{\text{TD}}}\|_\pi^2$ , then

$$\xi_{\ell+1} = \xi_\ell + 2\alpha(\theta_{\ell+1} - \theta_\ell)^\top \nabla_\theta \|V_\theta - V_{\theta_{\text{TD}}}\|_\pi^2|_{\theta=\theta_\ell} + \alpha^2 \|V_{\bar{G}_h(\theta_\ell)}\|_\pi^2,$$

by the fact that  $V_\theta$  is linear in  $\theta$ . By linearity, we further have  $\nabla_\theta \|V_\theta - V_{\theta_{\text{TD}}}\|_\pi^2 = 2\Sigma_\phi(\theta - \theta_{\text{TD}})$ . Combining with equation 82, we have

$$\xi_{\ell+1} \leq \xi_\ell - 2\alpha(1 - \gamma^h)\xi_\ell + \alpha^2 \|V_{\bar{G}_h(\theta_\ell)}\|_\pi^2.$$

By Cauchy-Schwarz inequality and equation 83, we have  $\|V_{\bar{G}_h(\theta_\ell)}\|_\pi^2 \leq \mathcal{C}\|\bar{G}_h(\theta)\|_2^2$  and thus  $\|V_{\bar{G}_h(\theta_\ell)}\|_\pi^2 \leq (1 + \gamma^h)^2 \mathcal{C}^2 \|V_{\theta_\ell} - V_{\theta_{\text{TD}}}\|_\pi^2$ . Then, the results in this proposition hold by the same argument in the proof of Proposition A.9 and the fact that

$$\lambda_{\min}(\Sigma_\phi)\|\theta - \theta_{\text{TD}}\|_2^2 \leq \|V_\theta - V_{\theta_{\text{TD}}}\|_\pi^2 \leq \lambda_{\max}(\Sigma_\phi)\|\theta - \theta_{\text{TD}}\|_2^2.$$

□

#### A.6 MSE UNDER FUNCTION APPROXIMATION ERRORS

Assuming  $A$  is diagonalizable with a real eigenbasis  $U$ , then  $A = U\Lambda U^{-1}$ , where  $\Lambda = \text{diag}(a_1, \dots, a_d)$  and  $a_j < 0$ . Without loss of generality, we set the initial parameter  $\theta_0 = (\theta_0^{(1)}, \dots, \theta_0^{(d)})$ . Since the parameter has the same dimension as the state, and that the true value function is quadratic in the state, it is under-parameterized.

**Theorem A.13** (MSE in underparameterized vector case). *For any  $t$ , we denote the scalar MSE in equation 6 as  $\text{MSE}_t(h; a, \theta_0)$ . Then, the mean squared error in d-dimensional case is*

$$\text{MSE}_t^{(p)}(h) \leq p \sum_{j=1}^p \text{MSE}_t(h; a_j, \theta_0^{(j)}). \quad (84)$$

In particular,

$$\text{MSE}_t^{(d)}(h) \leq d(C_0^{(d)} + C_1^{(d)}h + C_2^{(d)}h^2 + \mathcal{O}(h^3)),$$

where the coefficients decompose coordinate-wise in the form

$$C_k^{(d)} = \sum_{j=1}^d C_k^{(j)}, k = 0, 1, 2, 3.$$

$C_k^{(j)}$  are the coefficients  $C_0, C_1, C_2$  from the scalar case in Theorem 4.1 associated with the parameter  $(a_j, \theta_0^{(j)})$ .

*Proof.* We denote the rotated state  $\mathbf{Y}(t) := U^{-1}\mathbf{X}$ , then

$$d\mathbf{Y}(t) = U^{-1}d\mathbf{X}(t) = \Lambda\mathbf{Y}(t)dt + \sigma U^{-1}dW(t).$$

Define a new Brownian motion  $B(t) := U^{-1}W(t)$ , then  $B(t)$  is a d-dimensional Brownian motion with covariance matrix  $\text{Cov}(B(t)) = tU^{-1}(U^{-1})^\top$ . Then, each component  $Y_j$  satisfy

$$dY_j(t) = a_j Y_j(t)dt + \sigma \sum_{k=1}^d (U^{-1})_{j,k} dW_k(t) \quad j = 1, \dots, d.$$

We rewrite the form using

$$\sigma_j d\tilde{W}_j(t),$$

where  $\sigma_j = \sigma \sqrt{\sum_{k=1}^d (U^{-1})_{j,k}^2}$  is the diffusion in mode  $j$ .  $\tilde{W}_j$  is a scalar Brownian motion. Then, the component wise equation is

$$dY_j(t) = a_j Y_j(t) dt + \sigma_j d\tilde{W}_j(t).$$

Note that  $W_j(t)$  are correlated. Without loss of generality, we set  $Q = I_d$ , the cost in this case is  $r(\mathbf{X}(t)) = -h\mathbf{X}(t)^\top \mathbf{X}(t) = -h\mathbf{Y}(t)^\top \mathbf{Y}(t) = -h \sum_{j=1}^d Y_j(t)^2$ .

For each  $j = 1, \dots, d$ , the coordinate wise feature function and value function are

$$\begin{aligned} \phi_j(y_j) &= y_j^2 - \frac{\sigma^2}{\ln \gamma}, \\ V_\theta(\mathbf{Y}) &= \sum_{j=1}^d \theta^{(j)} \phi_j(Y_j). \end{aligned}$$

This is exactly a reparametrization of the svec form. At  $\mathbf{Y}(0) = 0$ , the true value is  $V = -\frac{\sigma^2}{\ln \gamma} \sum_{j=1}^d \frac{1}{\ln \gamma + 2a_j}$ .

Now, the dataset for coordinate  $j$  consists of scalar transitions  $(y_j(kh), r_j(kh), y_j((k+1)h))$  with  $r_j(kh) = -hy_j(kh)^2$ . The gradient for coordinate  $j$  is exactly the same as the scalar case. This means the coordinate wise MSE coincides with the scalar MSE with the coordinate wise parameters.

By definition,

$$\text{MSE}_t^{(d)}(h) = \mathbb{E} \left[ \left( \sum_{j=1}^d (V_{j, \theta_t^{(j)}} - V_j) \right)^2 \right],$$

where  $V_{j, \theta_t^{(j)}}$  is the scalar value function estimation under the  $j$ th coordinate wise parameters of the coordinate wise value function  $V_j$ .

Denote  $e_j(t) := V_{j, \theta_t^{(j)}} - V_j$ . We have

$$\begin{aligned} \text{MSE}_t^{(d)}(h) &= \mathbb{E} \left[ \left( \sum_{j=1}^d e_j(t) \right)^2 \right] = \sum_{j=1}^d \mathbb{E} [e_j(t)^2] + 2 \sum_{1 \leq i < j \leq d} \mathbb{E} [e_i(t) e_j(t)] \\ &= \sum_{j=1}^d \text{MSE}_t(h; a_j, \theta_0^{(j)}) + 2 \sum_{1 \leq i < j \leq d} \mathbb{E} [e_i(t) e_j(t)]. \end{aligned}$$

By Cauchy Schwarz inequality for the cross term,

$$\begin{aligned} \text{MSE}_t^{(d)}(h) &\leq \sum_{j=1}^d \text{MSE}_t(h; a_j, \theta_0^{(j)}) + 2 \sum_{1 \leq i < j \leq d} \sqrt{\text{MSE}_t(h; a_j, \theta_0^{(j)}) \text{MSE}_t(h; a_i, \theta_0^{(i)})} \\ &= \sum_{j=1}^d \text{MSE}_t(h; a_j, \theta_0^{(j)}) + \left( \left( \sum_{j=1}^d \sqrt{\text{MSE}_t(h; a_j, \theta_0^{(j)})} \right)^2 - \sum_{j=1}^d \text{MSE}_t(h; a_j, \theta_0^{(j)}) \right). \end{aligned}$$

Again, by Cauchy Schwarz inequality, we have

$$\left( \sum_{j=1}^d \sqrt{\text{MSE}_t(h; a_j, \theta_0^{(j)})} \right)^2 \leq d \sum_{j=1}^d \text{MSE}_t(h; a_j, \theta_0^{(j)}).$$

Thus,

$$\begin{aligned} \text{MSE}_t^{(d)}(h) &\leq \sum_{j=1}^d \text{MSE}_t(h; a_j, \theta_0^{(j)}) + (d-1) \sum_{j=1}^d \text{MSE}_t(h; a_j, \theta_0^{(j)}) \\ &= d \sum_{j=1}^d \text{MSE}_t(h; a_j, \theta_0^{(j)}) \end{aligned}$$

This proves the upper bound of the MSE.  $\square$

**Corollary A.14.** *If we further assume that there exists a constant  $\rho < \frac{1}{d-1}$  such that for all  $i \neq j$ ,*

$$\mathbb{E}[e_i(t)e_j(t)] \geq \mathbb{E}\left[\sqrt{\text{MSE}_t(h; a_i, \theta_0^{(i)})\text{MSE}_t(h; a_j, \theta_0^{(j)})}\right].$$

*We have the lower bound*

$$\text{MSE}_t^{(d)}(h) \geq (1 - \rho(d-1)) \sum_{j=1}^d \text{MSE}_t(h; a_j, \theta_0^{(j)}). \quad (85)$$

*Proof.* Under the assumption, we have

$$\begin{aligned} \text{MSE}_t^{(d)}(h) &= \mathbb{E}\left[\left(\sum_{j=1}^d e_j(t)\right)^2\right] = \sum_{j=1}^d \mathbb{E}[e_j(t)^2] + 2 \sum_{1 \leq i < j \leq d} \mathbb{E}[e_i(t)e_j(t)] \\ &\geq \sum_{j=1}^d \text{MSE}_t(h; a_j, \theta_0^{(j)}) - 2\rho \sum_{1 \leq i < j \leq d} \mathbb{E}[e_i(t)e_j(t)]. \end{aligned}$$

By the similar argument as the proof of Theorem A.13 and Cauchy Schwarz inequality, we have

$$\begin{aligned} \text{MSE}_t^{(d)}(h) &\geq \sum_{j=1}^d \text{MSE}_t(h; a_j, \theta_0^{(j)}) - 2\rho \frac{d-1}{2} \sum_{j=1}^d \text{MSE}_t(h; a_j, \theta_0^{(j)}) \\ &= (1 - \rho(d-1)) \sum_{j=1}^d \text{MSE}_t(h; a_j, \theta_0^{(j)}). \end{aligned}$$

$\square$

Theorem A.13 together with Corollary A.14 conclude that the order of  $\text{MSE}_t^{(d)}(h)$  in  $h$  is the same as the scalar MSE with updated coefficients. Therefore, Corollaries 4.2 and 4.3 follow directly by the above results.

## A.7 FINITE-SAMPLE ANALYSIS OF STOCHASTIC TD(0) IN VECTOR CASE

Now, we move to the stochastic TD(0), which is an online setting. We observe an infinite trajectory

$$\{\mathbf{X}(kh), r(\mathbf{X}(kh))\}_{k=0}^{\infty},$$

generated from the OU chain. The stochastic TD(0) update is

$$\theta_{t+1} = \theta_t + \alpha_t G(\theta_t),$$

where

$$G(\theta_t) = \phi(\mathbf{X}(kh)) [r(\mathbf{X}(kh)) + (\gamma^h \phi(\mathbf{X}((k+1)h))^\top - \phi(\mathbf{X}(kh))^\top) \theta_t].$$

We consider the projected TD algorithm (Bhandari et al., 2018), the projected Markov TD(0) update is

$$\theta_{t+1} = \Pi_{\Theta_R}(\theta_t + \alpha_t G(\theta_t)) , \quad (86)$$

where  $\Theta_R := \{\theta \in \mathbb{R}^p : \|\theta\|_2 \leq R\}$  with  $R$  chosen so that  $\theta_{TD} \in \Theta_R$ , and  $\Pi_{\Theta_R} : \mathbb{R}^p \rightarrow \Theta_R$  is the Euclidean projection onto  $\Theta_R$ , i.e.,

$$\Pi_{\Theta_R}(\theta) = \begin{cases} \theta & \|\theta\|_2 \leq R \\ \frac{R}{\|\theta\|_2} \theta & \|\theta\|_2 > R \end{cases} . \quad (87)$$

In addition to Assumptions C1 and C2 in Section A.5, we introduce the following assumptions for the main theorem.

C3 There exists some constant  $\mathbb{G}$  for  $\forall \theta \in \Theta_R$  such that  $\mathbb{E}_\pi[\|G(\theta)\|_2^2] \leq \mathbb{G}$ .

One can show Assumption C3 holds for our OU process with quadratic setting, as  $\|G(\theta)\|_2^2$  is a polynomial of degree at most 8 in  $(\mathbf{X}, \mathbf{X}')$ , which is jointly Gaussian distributed under the stationary OU chain. Therefore, all the moments are finite. Since  $\Theta_R$  is compact, we have  $\sup_{\theta \in \Theta_R} \mathbb{E}_\pi[\|G(\theta)\|_2^2] < \infty$ . Importantly, Assumption C3 is much weaker than the bounded feature and reward assumptions used in Section 8 of Bhandari et al. (2018). Define

$$B_h := \mathbb{E}_\pi[(\phi(\mathbf{X}) - \gamma^h \phi(\mathbf{X}'))\phi(\mathbf{X})^\top] \\ \omega(h) = \frac{1}{2(1 - \gamma^h)} \lambda_{\min} \left( \Sigma_\phi^{-1/2} (\Sigma_\phi B_h + B_h^\top \Sigma_\phi) \Sigma_\phi^{-1/2} \right) .$$

**Theorem A.15 (Stochastic TD(0) finite time bound).** *Consider the projected TD(0) iterations with a constant  $\alpha$  such that  $0 < \alpha < \frac{1}{2\omega(h)(1-\gamma^h)}$ . Under assumptions C1-C3, for any integer  $t$ ,*

$$\mathbb{E}[\|V_{\theta_t} - V_{\theta_{TD}}\|_\pi^2] \leq e^{-\frac{1}{2}\alpha(1-\gamma^h)\omega(h)t} \|V_{\theta_0} - V_{\theta_{TD}}\|_\pi^2 + \frac{4\alpha\mathbb{G}^2}{(1-\gamma^h)^2\omega(h)^2} . \quad (88)$$

In particular, in parameter space

$$\mathbb{E}[\|\theta_t - \theta_{TD}\|_2^2] \leq \frac{e^{-\frac{1}{2}\alpha(1-\gamma^h)\omega(h)t}}{\lambda_{\min}(\Sigma_\phi)} \|V_{\theta_0} - V_{\theta_{TD}}\|_\pi^2 + \frac{4\alpha\mathbb{G}^2}{(1-\gamma^h)^2\omega(h)^2\lambda_{\min}(\Sigma_\phi)} . \quad (89)$$

*Proof.* Denote the bias of  $G(\theta)$  by  $\eta(\theta) := G(\theta) - \mathbb{E}_\pi[G(\theta)]$ . Since  $V_\theta$  is linear in  $\theta$ , we have  $V_{\theta_t + \alpha\eta(\theta_t) + \alpha\mathbb{E}[G(\theta_t)]} = V_{\theta_t} + \alpha V_{\eta(\theta_t)} + \alpha V_{\mathbb{E}_\pi[G(\theta_t)]}$ . Thus,

$$\begin{aligned} \|V_{\theta_{t+1}} - V_{\theta_{TD}}\|_\pi^2 &\leq \|V_{\theta_t + \alpha\eta(\theta_t) + \alpha\mathbb{E}[G(\theta_t)]} - V_{\theta_{TD}}\|_\pi^2 \\ &= \|(V_{\theta_t} - V_{\theta_{TD}}) + \alpha V_{\eta(\theta_t)} + \alpha V_{\mathbb{E}_\pi[G(\theta_t)]}\|_\pi^2 \\ &= \|(V_{\theta_t} - V_{\theta_{TD}}) + \alpha V_{\mathbb{E}_\pi[G(\theta_t)]}\|_\pi^2 + \alpha^2 \|V_{\eta(\theta_t)}\|_\pi^2 \\ &\quad + 2\alpha \langle (V_{\theta_t} - V_{\theta_{TD}}) + \alpha V_{\mathbb{E}_\pi[G(\theta_t)]}, V_{\eta(\theta_t)} \rangle_\pi \\ &= \|V_{\theta_t} - V_{\theta_{TD}}\|_\pi^2 + \alpha^2 \|V_{\eta(\theta_t)}\|_\pi^2 + \alpha^2 \|V_{\mathbb{E}_\pi[G(\theta_t)]}\|_\pi^2 \\ &\quad + 2\alpha \langle V_{\theta_t} - V_{\theta_{TD}}, V_{\mathbb{E}_\pi[G(\theta_t)]} \rangle_\pi + 2\alpha \langle V_{\theta_t} - V_{\theta_{TD}}, V_{\eta(\theta_t)} \rangle_\pi \\ &\quad + 2\alpha^2 \langle V_{\mathbb{E}_\pi[G(\theta_t)]}, V_{\eta(\theta_t)} \rangle_\pi . \end{aligned}$$

Now, we need to bound each of the terms in the above equation. The cross terms can be bounded using the facts that  $\langle V_{\theta_t} - V_{\theta_{TD}}, V_{\mathbb{E}_\pi[G(\theta_t)]} \rangle_\pi \leq -(1 - \gamma^h)\omega(h)\|V_{\theta_t} - V_{\theta_{TD}}\|_\pi^2$ , and  $\|V_{\mathbb{E}_\pi[G(\theta_t)]}\|_\pi^2 \leq L_n \|V_{\theta_t} - V_{\theta_{TD}}\|_\pi^2$ , which are obtained from the proof of Proposition A.12. That is, by monotonicity,

$$2\alpha \langle V_{\theta_t} - V_{\theta_{TD}}, V_{\mathbb{E}_\pi[G(\theta_t)]} \rangle_\pi \leq -2\alpha(1 - \gamma^h)\omega(h)\|V_{\theta_t} - V_{\theta_{TD}}\|_\pi^2 .$$



Therefore, we chose  $\alpha$  such that  $\alpha \leq \frac{(1-\gamma^h)\omega(h)}{L_h^2}$ , so

$$\mathbb{E} [\|V_{\theta_t} - V_{\theta_{\text{TD}}}\|_\pi^2 + \alpha^2 \|V_{\eta(\theta_t)}\|_\pi^2] \leq (1 - \alpha(1 - \gamma^h)\omega(h)) \mathbb{E} [\|V_{\theta_t} - V_{\theta_{\text{TD}}}\|_\pi^2].$$

For the term  $\|V_{\eta(\theta_t)}\|_\pi^2$ , we have  $\|V_{\eta(\theta_t)}\|_\pi^2 \leq \lambda_{\max}(\Sigma_\phi) \|\eta(\theta_t)\|_2^2$ . Taking expectation and use Assumption C4, we have

$$\mathbb{E} [\|V_{\eta(\theta_t)}\|_\pi^2] \leq \lambda_{\max}(\Sigma_\phi) \sup_{\theta \in \Theta_R} \mathbb{E} [\|\eta(\theta_t)\|_2^2] \leq \mathbb{G}^2.$$

Thus,  $\alpha^2 \mathbb{E} [\|V_{\eta(\theta_t)}\|_\pi^2] \leq \alpha^2 \mathbb{G}^2$ . This gives bound of  $\|V_{\eta(\theta_t)}\|_\pi^2$  and  $\langle V_{\theta_t} - V_{\theta_{\text{TD}}}, V_{\eta(\theta_t)} \rangle_\pi$ , since  $\|V_{\theta_t} - V_{\theta_{\text{TD}}}\|_\pi$  is finite.

Now, we will bound  $2\alpha \mathbb{E} [\langle (V_{\theta_t} - V_{\theta_{\text{TD}}}) + \alpha V_{\mathbb{E}_\pi[G(\theta_t)]}, V_{\eta(\theta_t)} \rangle_\pi]$ . Split it into two parts

$$\begin{aligned} & 2\alpha \mathbb{E} [\langle (V_{\theta_t} - V_{\theta_{\text{TD}}}) + \alpha V_{\mathbb{E}_\pi[G(\theta_t)]}, V_{\eta(\theta_t)} \rangle_\pi] \\ &= 2\alpha \mathbb{E} [\langle V_{\theta_t} - V_{\theta_{\text{TD}}}, V_{\eta(\theta_t)} \rangle_\pi] + 2\alpha^2 \mathbb{E} [\langle V_{\mathbb{E}_\pi[G(\theta_t)]}, V_{\eta(\theta_t)} \rangle_\pi]. \end{aligned}$$

By Cauchy–Schwarz inequality on the expectation, we have

$$\begin{aligned} & 2\alpha \mathbb{E} [\langle V_{\theta_t} - V_{\theta_{\text{TD}}}, V_{\eta(\theta_t)} \rangle_\pi] \\ & \leq 2\alpha \mathbb{E} [\|V_{\theta_t} - V_{\theta_{\text{TD}}}\|_\pi] \mathbb{E} [\|V_{\eta(\theta_t)}\|_\pi] \leq 2\alpha \sqrt{\mathbb{E} [\|V_{\theta_t} - V_{\theta_{\text{TD}}}\|_\pi^2] \mathbb{E} [\|V_{\eta(\theta_t)}\|_\pi^2]}. \end{aligned}$$

By C4, we have  $\mathbb{E} [\|V_{\eta(\theta_t)}\|_\pi^2] \leq \mathbb{G}^2$ . Applying Young’s inequality,  $2bd \leq \delta d^2 + \frac{b^2}{\delta}$ , with  $d = \sqrt{\mathbb{E} [\|V_{\theta_t} - V_{\theta_{\text{TD}}}\|_\pi^2]}$  and  $b = \mathbb{G}$ , choose  $\delta = (1 - \gamma^h)\omega(h)$ , we get

$$|2\alpha \mathbb{E} [\langle V_{\theta_t} - V_{\theta_{\text{TD}}}, V_{\eta(\theta_t)} \rangle_\pi]| \leq \alpha(1 - \gamma^h)\omega(h) \mathbb{E} [\|V_{\theta_t} - V_{\theta_{\text{TD}}}\|_\pi^2] + \frac{\alpha}{(1 - \gamma^h)\omega(h)} \mathbb{G}^2.$$

For  $2\alpha^2 \mathbb{E} [\langle V_{\mathbb{E}_\pi[G(\theta_t)]}, V_{\eta(\theta_t)} \rangle_\pi]$ , we work in the similar way as we did for the first term. By Cauchy–Schwarz inequality

$$\begin{aligned} |2\alpha^2 \mathbb{E} [\langle V_{\mathbb{E}_\pi[G(\theta_t)]}, V_{\eta(\theta_t)} \rangle_\pi]| & \leq 2\alpha^2 \sqrt{\mathbb{E} [\|V_{\mathbb{E}_\pi[G(\theta_t)]}\|_\pi^2] \mathbb{E} [\|V_{\eta(\theta_t)}\|_\pi^2]} \\ & \leq 2\alpha^2 L_h^2 \mathbb{G} \sqrt{\mathbb{E} [\|V_{\theta_t} - V_{\theta_{\text{TD}}}\|_\pi^2]}. \end{aligned}$$

Apply Young’s inequality with the same  $\delta$ , we have

$$2\alpha^2 L_h^2 \mathbb{G} \sqrt{\mathbb{E} [\|V_{\theta_t} - V_{\theta_{\text{TD}}}\|_\pi^2]} \leq \alpha^2 L_h^2 \mathbb{E} [\|V_{\theta_t} - V_{\theta_{\text{TD}}}\|_\pi^2] + \frac{\alpha^2 \mathbb{G}^2}{(1 - \gamma^h)\omega(h)}.$$

Therefore,

$$\begin{aligned} & 2\alpha \mathbb{E} [\langle (V_{\theta_t} - V_{\theta_{\text{TD}}}) + \alpha V_{\mathbb{E}_\pi[G(\theta_t)]}, V_{\eta(\theta_t)} \rangle_\pi] \\ & \leq \alpha(1 - \gamma^h)\omega(h) \mathbb{E} [\|V_{\theta_t} - V_{\theta_{\text{TD}}}\|_\pi^2] + \frac{\alpha}{(1 - \gamma^h)\omega(h)} \mathbb{G}^2 \\ & \quad + \alpha^2 L_h^2 \mathbb{E} [\|V_{\theta_t} - V_{\theta_{\text{TD}}}\|_\pi^2] + \frac{\alpha^2 \mathbb{G}^2}{(1 - \gamma^h)\omega(h)} \\ & = (\alpha(1 - \gamma^h)\omega(h) + \alpha^2 L_h^2) \mathbb{E} [\|V_{\theta_t} - V_{\theta_{\text{TD}}}\|_\pi^2] + \left( \frac{\alpha}{(1 - \gamma^h)\omega(h)} + \frac{\alpha^2}{(1 - \gamma^h)\omega(h)} \right) \mathbb{G}^2. \end{aligned}$$

Combining the above bounds, we have

$$\begin{aligned} & \mathbb{E} [\|V_{\theta_{t+1}} - V_{\theta_{\text{TD}}}\|_\pi^2] \\ & \leq (1 - 2\alpha(1 - \gamma^h)\omega(h) + \alpha^2 L_h^2) \mathbb{E} [\|V_{\theta_t} - V_{\theta_{\text{TD}}}\|_\pi^2] \\ & \quad + (\alpha(1 - \gamma^h)\omega(h) + \alpha^2 L_h^2) \mathbb{E} [\|V_{\theta_t} - V_{\theta_{\text{TD}}}\|_\pi^2] \\ & \quad + \left( \frac{\alpha}{(1 - \gamma^h)\omega(h)} + \frac{\alpha^2}{(1 - \gamma^h)\omega(h)} \right) \mathbb{G}^2 + \alpha^2 \mathbb{G}^2 \\ & = (1 - \alpha(1 - \gamma^h)\omega(h) + 2\alpha^2 L_h^2) \mathbb{E} [\|V_{\theta_t} - V_{\theta_{\text{TD}}}\|_\pi^2] \\ & \quad + \left( \frac{\alpha}{(1 - \gamma^h)\omega(h)} + \frac{\alpha^2}{(1 - \gamma^h)\omega(h)} + \alpha^2 \right) \mathbb{G}^2. \end{aligned}$$

Taking  $\alpha \leq \min \left\{ \frac{(1-\gamma^h)\omega(h)}{4L_h^2}, \frac{1}{2\omega(h)(1-\gamma^h)} \right\} \leq \frac{1}{2\omega(h)(1-\gamma^h)}$ , we have  $1 - \alpha(1 - \gamma^h)\omega(h) + 2\alpha^2 L_h^2 \leq 1 - \alpha(1 - \gamma^h)\omega(h)$  and  $1 - \frac{\alpha(1-\gamma^h)\omega(h)}{2} \in (0, 1)$ . Therefore, we have the recursive form

$$\mathbb{E} [\|V_{\theta_{t+1}} - V_{\theta_{TD}}\|_\pi^2] \leq \left(1 - \frac{\alpha(1 - \gamma^h)\omega(h)}{2}\right) \mathbb{E} [\|V_{\theta_t} - V_{\theta_{TD}}\|_\pi^2] + \frac{2\alpha\mathbb{G}^2}{(1 - \gamma^h)\omega(h)}.$$

Iterating the above form,

$$\begin{aligned} & \mathbb{E} [\|V_{\theta_t} - V_{\theta_{TD}}\|_\pi^2] \\ & \leq \left(1 - \frac{\alpha(1 - \gamma^h)\omega(h)}{2}\right)^t \mathbb{E} [\|V_{\theta_0} - V_{\theta_{TD}}\|_\pi^2] + \frac{2\alpha\mathbb{G}^2}{(1 - \gamma^h)\omega(h)} \sum_{j=0}^{t-1} \left(1 - \frac{\alpha(1 - \gamma^h)\omega(h)}{2}\right)^j \\ & \leq (1 - \alpha(1 - \gamma^h)\omega(h))^t \mathbb{E} [\|V_{\theta_0} - V_{\theta_{TD}}\|_\pi^2] + \frac{4\alpha\mathbb{G}^2}{(1 - \gamma^h)^2\omega(h)^2}. \end{aligned}$$

Therefore,

$$\mathbb{E} [\|V_{\theta_t} - V_{\theta_{TD}}\|_\pi^2] \leq e^{-\frac{1}{2}\alpha(1-\gamma^h)\omega(h)t} \|V_{\theta_0} - V_{\theta_{TD}}\|_\pi^2 + \frac{4\alpha\mathbb{G}^2}{(1 - \gamma^h)^2\omega(h)^2}.$$

In parametric space, the result is obtained by the fact that

$$\|V_{\theta_t} - V_{\theta_{TD}}\|_\pi^2 \geq \lambda_{\min}(\Sigma_\phi) \|\theta_t - \theta_{TD}\|_2^2.$$

□

The finite sample bound for stochastic TD under our setting holds with mild assumptions. For instance, such result hold in Bhandari et al. (2018) with more restrictive assumptions such as the geometrically mixing assumption, bounded feature and bound reward assumptions.

#### A.8 NUMERICAL EVALUATION OF THE ANALYTICAL ONE-STEP MSE

In Lemma A.2, we derived an exact, closed-form expression for the MSE after one-step update. The full expression, along with the *Mathematica* code for symbolic computation, are included in the supplementary material. Although this expression does not capture the behavior of the asymptotic MSE, analysis of one-step MSE offers valuable insights, as it is an exact form free from any approximation error. However, the expression is too complex to parse and difficult to interpret. Instead, we gain intuition by numerically evaluating the MSE over a range of key parameter values and examining its characteristics in this section. We fix the parameters  $\sigma = 1, \alpha = 1$  throughout this section unless otherwise specified.

**Behaviour of  $\text{MSE}_1(h)$ .** To begin, we visualize the MSE as a function of the discretization  $h$  in Figure 10, for two different parameter settings, both starting from  $\theta_0 = -1$ . The figure show that for small  $h$ , MSE behaves quadratically in  $h$ . Moreover, each curve exhibits a clear trade-off in  $h$ , highlighting the importance of choosing an appropriate discretization step for accurate value estimation in TD learning.

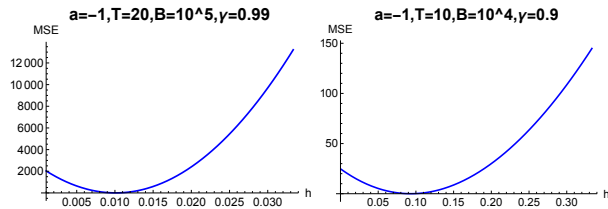

Figure 10:  $\text{MSE}_1$  as a function of  $h$

**Dependence of  $h^*$  and  $\text{MSE}^*$  on  $B$  and  $T$ .** Next, we examine how the optimal step-size  $h^*$  and the corresponding minimal MSE,  $\text{MSE}^* := \text{MSE}_1(h^*)$ , vary with the horizon  $T$ , data budget  $B$ . Fixing  $a = -1, \gamma = 0.99, \alpha = 1.0, \theta_0 = 0$ , we sweep  $T$  and  $B$  over a range of values. The minimizer  $h^*$  is computed by optimizing the exact MSE in *Mathematica* over the interval of  $h$  in  $[T/B, T/2]$ . Figure 11 shows  $h^*$  and  $\text{MSE}^*$  over  $T \in [0.5, 50]$  and  $B \in [1e3, 1e6]$ , with  $\theta_0 = 0$ , where the color represents the value of  $h^*$  and  $\text{MSE}^*$ , respectively. Both  $h^*$  and  $\text{MSE}^*$  exhibit some variation across different regions of the parameter space, with  $\text{MSE}^*$  spanning a much wider range than  $h^*$ . They remain relatively consistent for the majority of values in  $T$  and  $B$ . However, for small  $B$ ,

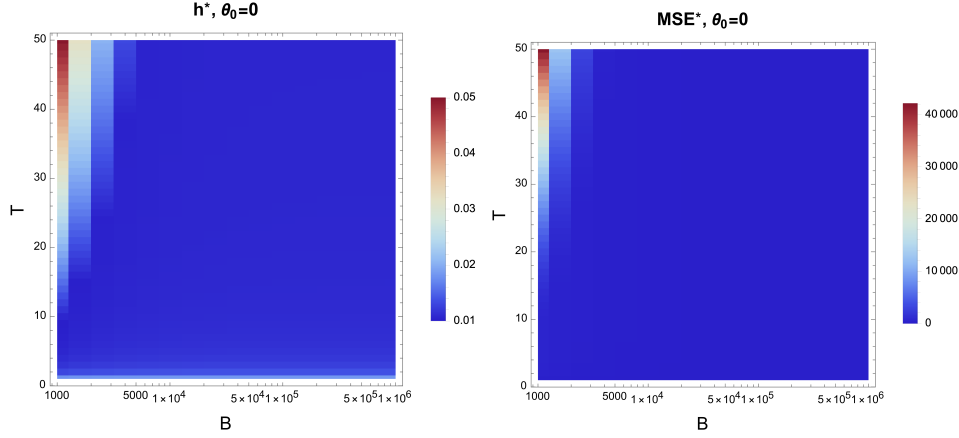Figure 11:  $h^*$  and  $MSE^*$  of one-step TD over  $B$  and  $T$ 

the changes are more pronounced:  $h^*$  increases rapidly with  $T$ , and a similar trend is observed in  $MSE^*$ . This behavior arises because the lower bound of  $h$  is determined by  $T/B$  where we assign the entire data budget to a single trajectory. When  $B$  is small, this lower bound would be larger and dominates  $h^*$ , and  $MSE^*$  is driven up accordingly. In contrast, as  $B$  increases,  $h^*$  seems to stabilize and shows little sensitivity to  $T$ , as it is no longer constrained by the lower bound  $T/B$ .

The phenomenon is further illustrated in Figure 12 which plots  $h^*$  as a function of  $T$  at  $B = 1e3$  (left) and  $B = 1e6$  (right). For  $B = 1e3$ , there is a transition point at  $T = 9.5$ ,  $h^* = 0.01$ , exhibiting a noticeable shift in the behavior of the curve. At this point,  $h^*$  coincides with the lower bound of  $T/B$  and thereafter increases linearly with  $T$ . In contrast, for  $B = 1e6$ ,  $h^*$  is mostly constant except when  $T < 5$ . This suggests that for short estimation horizon  $T$ , a slightly larger  $h$  (fewer samples per trajectory) can be optimal.

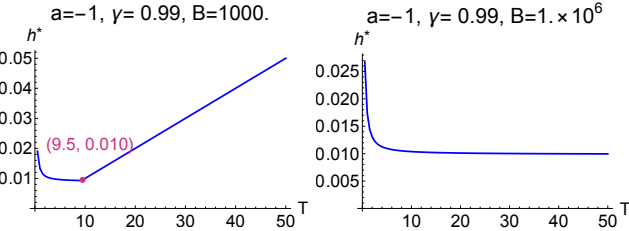Figure 12:  $h^*$  as a function of  $T$  for different values of  $B$ 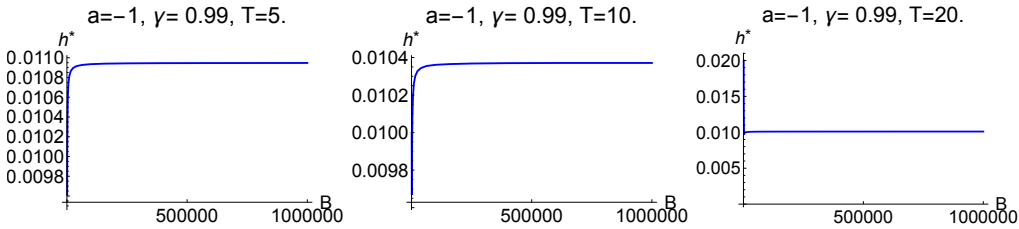Figure 13:  $h^*$  as a function of  $B$  for different values of  $T$ 

Similarly, we plot  $h^*$  as a function of  $B$  while fixing  $T$  to different values, shown in Figure 13. The results illustrates that the optimal step size  $h$  remains largely constant for large  $B$ . In contrast, in the small data regime ( $B \approx 1000$ ),  $h^*$  is constrained by the lower bound  $T/B$  at some value of  $T$ . Once  $B$  increases enough to free  $h^*$  from that constraint,  $h^*$  decreases rapidly to the unconstrained optimum and then stabilizes around a certain value.

## A.9 LQR CONTROL EXPERIMENTS SETUP

For LQR control experiments in Appendix 5.4, we consider the following 2-dimensional stochastic system:

$$d\mathbf{x}(t) = \mathbf{A}\mathbf{x}(t)dt + \mathbf{B}\mathbf{u}(t)dt + \sigma d\mathbf{w}(t) \quad (90)$$

$$V = \mathbb{E} \left[ \int_0^\infty \gamma^t [\mathbf{x}(t)^\top \mathbf{Q}\mathbf{x}(t) + \mathbf{u}(t)^\top \mathbf{R}\mathbf{u}(t)] dt \right] \quad (91)$$

The initial state is  $\mathbf{x}(0) = [0, 0]^\top$  and the parameters are

$$\mathbf{A} = \begin{bmatrix} -10 & 1 \\ -0.002 & -2 \end{bmatrix}, \quad \mathbf{B} = \begin{bmatrix} 0 \\ 2 \end{bmatrix}, \quad \mathbf{Q} = I_2, \quad \mathbf{R} = 10I_2, \quad \sigma = 1, \quad \gamma = 0.9$$

where  $I_2$  denotes the  $2 \times 2$  identity matrix.

## A.10 COMPUTATIONAL RESOURCES

The *Mathematica* scripts were executed on a laptop with Intel i5 CPU and 8 GB of RAM. All numerical experiments in Appendix 5 can be run on a standard desktop equipped with 64 GB of RAM (sufficient to load the full dataset into memory). For computing MSE for various parameters, we leveraged a compute cluster to parallelize and accelerate the workload. The desktop-version code are provided in the supplementary materials; cluster-specific code is omitted to preserve anonymity.
